# Supplementary material for: Morphology of bar-built estuaries: relation between planform shape and depth distribution
Source: Copernicus journal article supplement (doi:10.5194/esurf-2018-18), 2018-02-22
Supplement: Supplementary file [file esurf-2018-18-AC3-supplement.pdf]

Utrecht, 30 April 2018

To the Editor and Associate Editor,

Please find enclosed the revised manuscript 'Morphology of bar-built estuaries: empirical relation between planform shape and depth distribution' by authors Jasper R.F.W. Leuven, Sanja Selaković and Maarten G. Kleinhans.

We found the reviews helpful and positive. We thank the reviewers in the acknowledgements. All reviewers' suggestions are now implemented in the new version of the manuscript.

Below we describe (in *italics*) how we used the reviewer comments to improve the manuscript. Detailed textual comments were mostly incorporated and sometimes used as indicator where text clarity had to be improved. We attach a PDF that highlights the changes to the first submission and refer to the changes below.

Kind regards,  
Jasper Leuven (on behalf of all authors)

### **RC1: 'Reviewers comments for esurf-2018-18', Ian Townend, 13 Mar 2018**

This paper provides a useful examination of along-channel variations in channel width hypsometry. The paper is well organised and clearly written. The data used and method of analysis are, in themselves, sound. However, I would like to suggest a few changes that would give the paper a more precise focus. These relate to the methodology and what it can be said to be examining.

*We found the review helpful and positive and thank the reviewer in the acknowledgements. Below we describe (in italics) how we used the reviewer comments to improve the manuscript.*

The method of Strahler is adopted without any substantive explanation. However the Strahler equation was proposed for terrestrial landscapes and is based on plan areas as a function of elevation. The paper considers submerged (or at times partially submerged) bodies in terms of the cross-section width. The basis of this transposition is not explained and the definitions of the terms in Equation 1 are not particularly clear. My reading is that 'h' is the proportion of total section height, and that 'y' is the proportion of the total section width. This does however omit the basis of r (which is a function of minimum and maximum plan area in Strahler) and makes it a fit parameter. This is useful strategy but Equation 1 is now simply a fitted shape function. In the literature other authors (e.g. Boon and Byrne, 1981; and Townend, 2008) have adapted Strahler for use in the marine environment. The authors here have preferred the original (terrestrially based) Strahler equation. Given that they are all empirical relationships this may be entirely appropriate but some discussion as to why would provide a stronger link with the existing literature.

*We now clarify in the text (1) why we adopted the Strahler formulation, (2) why the environment for which it was proposed is less relevant and (3) that we indeed made r and z fitting parameters and use Equation 1 as a fitting function. The text now reads: "In the past, multiple authors have proposed empirical relations for the hypsometric shape of terrestrial landscapes (Strahler 1952) and (partially) submerged bodies (Boon, 1981; Wang, 2002; Toffolon, 2007; Townend, 2008) (see Townend, 2008 for review). All equations, except for Wang (2002), predict a fairly similar hypsometric curve based on the volume and height range of the landform (Townend, 2008). While it is of interest to use these empirical relations to predict the occurring altitude variation of a landform, the framework here is different, because in this case the hypsometric curve is applied across channel width: it is a cross-sectional hypsometric curve. We aim to use the general hypsometric curve to characterise the occurring cross-sectional hypsometry, which is similar to the approach of Toffolon & Crosato (2007) who fitted a power function to 15 zones along the Western Scheldt. To that end, it is less relevant for which environment the hypsometric relation was proposed, as long as it is capable to describe the*

*range of occurring hypsometries. For the case of the estuarine environment (Fig. 3), the hypsometric curve should be able to describe variations in concavity and variations in the slope of the curve at the inflection point. Here we use the original (Strahler 1952) formulation, which is capable to do so, but in principle any equation that fits well could be used."*

*After the Strahler equation we added the reviewers suggestion that 'h' is the proportion of total section height, that 'y' is the proportion of the total section width and that our approach changes the definition of r (which is a function of minimum and maximum plan area in Strahler) to make it a fitting parameter.*

In the light of the above, I would suggest that it might also be appropriate to add the word empirical to both the title and the section entitled 'Relation between morphology and hypsometry'.

*We added the word 'empirical' in the manuscript title and section title, as well as in the abstract text.*

My other main concern relates to the use of the word 'ideal' in relation to the width of the channel. The study is essentially a geometric one, extracting width information from detailed bathymetries in four estuaries. Without consideration of some other metric such as tidal elevation/velocity, energy dissipation or the energy flux in the system it is not possible to assert a "state" of the system relative to equilibrium and hence to define what constitutes an "ideal" system, as classically defined. Whilst the authors make clear how they have defined their ideal plan form (width at the mouth and river) this only serves to compound a prevailing myth that the ideal is based on convergent width. If the cross-sectional area is exponentially convergent the estuary meets the basis of Pillsbury's original definition for an ideal estuary. If it happens that the hydraulic depth is constant along the channel then the CSA convergence length equates to the width convergence length.

*The figure below shows the along-channel profiles of width, width-averaged depth and cross-sectional area for the systems we studied. Cross-sectional area profiles are rather linear than exponentially convergent and along-channel depth profiles are rarely constant, so the estuaries deviate from Pillsbury's original definition for an ideal estuary, but it is precisely the effect of deviation from an ideal shape on bar patterns and bed levels that we are interested in.*

*The reviewer comments that the equilibrium ideal state of an estuary might be confused with the geometric ideal width that we use in our study. To prevent any confusion between the equilibrium estuary state and the geometric width profile, we now clarify the definition of an ideal estuary in a separate section at the start of the methods and explicitly state its relation with geometric properties. Given that channel width is the only geometric property that we can measure from aerial photography we subsequently explain that deviation from an ideal converging width profile is the only way we can approximate deviation from an ideal estuary shape.*

*The new text reads:*

*"A useful model to describe the morphology of estuaries is that of the 'ideal estuary'. In an ideal estuary the energy per unit width remains constant along estuarine channels. This ideal state can be met when tidal range and tidal current are constant along-channel, such that the loss of tidal energy by friction is balanced by the gain in tidal energy per unit width by channel convergence (Pillsbury, 1956; Dronkers, 2017). In case the depth is constant along the channel, the ideal estuary conditions are approximately met when the width is exponentially decreasing in landward direction (Pillsbury, 1956; Langbein, 1963; Savenije, 2006; Toffolon & Crosato, 2010; Savenije, 2015), which also implies an along-channel converging cross-sectional area. However, when depth and friction are not constant along-channel, but for example linearly decreasing in landward direction, less convergence in width is required to maintain constant energy per unit of width. Many natural estuaries are neither in equilibrium nor in a condition of constant tidal energy per unit width. They deviate from the ideal ones as result of varying degree of sediment supply, lack of time for adaptation to changing upstream conditions and sea-level rise (Townend, 2012; de Haas et al., 2017). Whether continued*

sedimentation would reform bar-built estuaries into proper ideal estuaries remains an open question. For our application, the concept of ideal estuaries is useful to assess the degree of deviation from ideal because of the width variations observed as bars, tidal flats and saltmarsh. While we expect a somewhat different degree of convergence such that the ideal state of constant energy per unit of width is approximately maintained, we do not study the deviation of this convergence length from that in ideal estuaries.

Ideally, we would want to assess the degree to which an estuary is in equilibrium from an aerial photograph, because this is often the only data available. However, the only indicator derivable from aerial photography is channel width and thus deviation from a converging width profile. Therefore, in Leuven et al. (2017), we defined the excess width, which is the local width of the estuary minus our approximation of the potential ideal estuary width. Here, the ideal estuary width is approximated as an exponential fit on the width of the mouth and the width of the landward river. While the empirical measure of ‘ideal width’ should not be confused with the ‘ideal state’ of an estuary, it is the only practical way to estimate deviation from an ideal estuary based on the estuary outline only. Moreover, it proved to be a good indicator of occurring bar patterns (Leuven et al., 2017) and will therefore be applied in this paper to study hypsometries.”

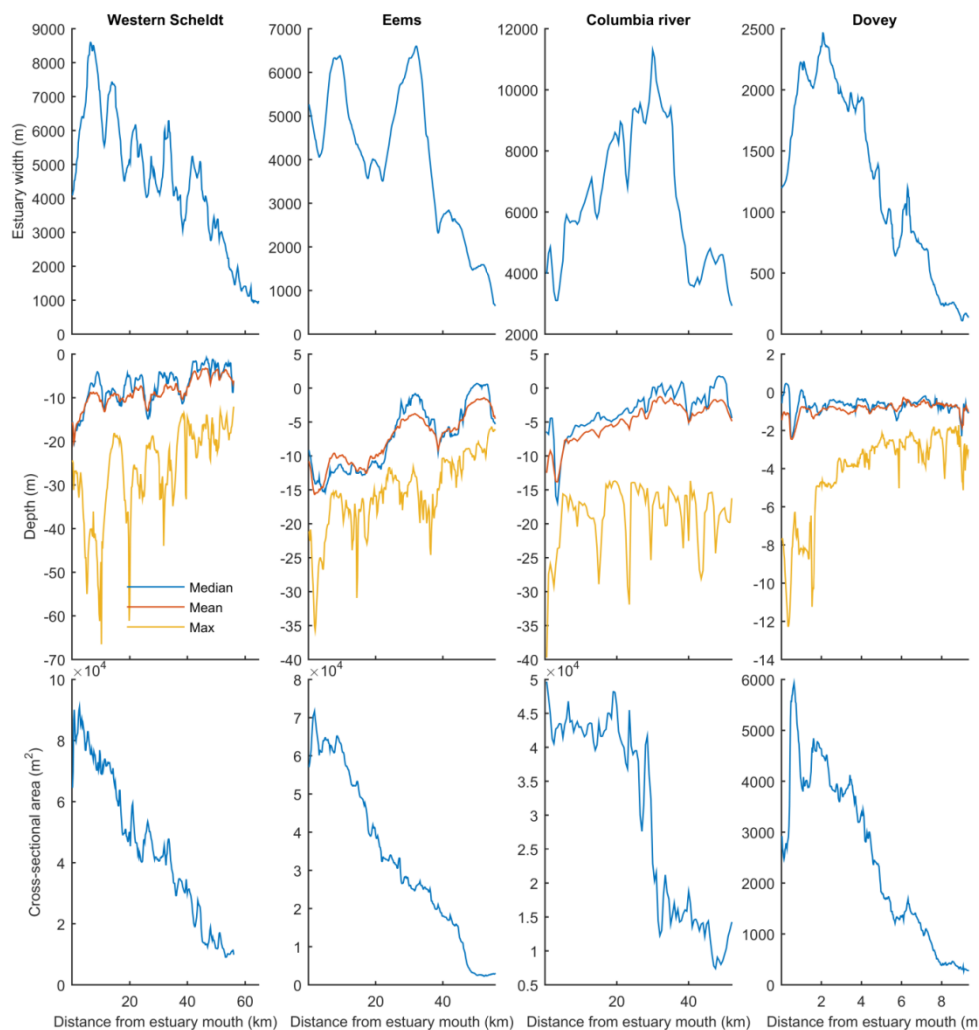

We considered alternative wording for ideal width in the remainder of the manuscript. Because we now explain how we derived this geometrical property from the concept of an ideal shape and explicitly state that it should not be confused with the equilibrium state, we decided to keep te

*wording of ideal width. Moreover (1) it is precisely the deviation from an ideal shape that we are interested in, (2) the use of this terminology is in agreement with previous work (Leuven et al., 2017) and (3) other wordings that we considered might lead to misunderstanding, e.g. minimal width convergence can be read as minimal convergence. If the editor prefers different, we will consider the use of minimal width convergence, convergence of minimum width or something similar.*

There is some evidence from UK estuaries that width-depth variations provide a degree of system redundancy, allowing the system to adapt and so do minimum work, whilst maintaining the CSA convergence. This is illustrated in the attached figure for the Humber, where the CSA is clearly exponentially convergent. The corresponding width and depth values vary about the exponential fits (seemingly in an inverse manner that it has been suggested is linked to overall channel sinuosity). Importantly in this context the width is invariably narrower and deeper at the mouth for a number of reasons (geology, drift, etc). Consequently, I would reason that the authors have examined the variance from the minimal width convergence. This does not detract from the results but it is important not to confuse a valid conclusion relating to along channel variation in width hypsometry, with assertions relating to an ideal system and its state relative to equilibrium. For the latter, I am of the opinion that we need a physically based determination of the hypsometry, rather than an empirical one.

*Thank you, we agree and this case agrees with our findings. See reply to comment above about confusion of ideal width with ideal system state. We now clarify this in a separate section in the methods.*

*As for the suggestion that we need a physically based determination of the hypsometry: this is the ultimate aim that is presently beyond reach. We added a paragraph to the discussion about this idea, which reads: "Here we found that the cross-sectional hypsometry relates to occurring bar patterns and estuarine geometry. In contrast to an empirical description, ideally, a physics-based determination of the hypsometry would be favourable. However, with the current state of the art of bar theory (Leuven et al., 2016) and relations for intertidal area, tidal prism, cross-sectional area and flow velocities (O'Brien, 1969; Friedrichs & Aubrey, 1988) it is not yet possible to derive a theoretical prediction of hypsometry. For example, bar theory (Seminara & Tubino, 2001; Schramkowski et al., 2002) could predict occurring bar patterns on top of an (ideal) estuary shape, but current theories overpredict their dimensions (Leuven et al., 2016) and it is still impossible to scale these to bed level variations, because the theories are linear. In addition to that, the resulting predictions would need to meet the requirement that the predicted bed levels and the intertidal area together lead to hydrodynamic conditions that fit the estuary as well."*

Finally a point of detail. In the discussion, you refer to whole system hypsometry as an oversimplification. However, these whole system descriptions are consistent with the original Strahler concept of a basin hypsometry based on plan area. In a landform context these remain entirely valid descriptions. In terms of estuary dynamics they do not capture the along channel variations. As you note, there can be a significant variation of the high a low water surfaces along the estuary. Consequently, the along-channel cross-section hypsometry should not be assumed to be relative to a fixed vertical datum. Interpreting these along channel variations remains an open question because of the reasons outlined above.

*We added the suggestions of the reviewer to the paragraph about the degree to which whole system hypsometry are oversimplifications for estuaries. The paragraph now reads, with bold parts added: "Previously, hypsometry was used to summarise the geometry of entire tidal basins or estuaries (Boon 1981; Dieckmann 1987; Townend 2008). **The whole system descriptions are consistent with the original Strahler (1952) concept of a basin hypsometry based on plan area, which is a valid description in a landform context.** However, these descriptions oversimplify **the along-channel variability** in estuaries that are relatively long. These estuaries typically have a linear bed profile varying from an along-channel constant depth to strongly linear sloping (e.g. the Mersey in UK). In*

the latter case, the elevation at which subtidal and intertidal area occur varies significantly along-channel (Blott 2006). Additionally, friction and convergence may cause the tidal range to either dampen or amplify causing variation in tidal elevation, subtidal area and tidal prism (Savenije 2006). **Consequently, the along-channel cross-section hypsometry should be assumed to be relative to an along-channel varying high water level or mean sea level rather than an along-channel fixed vertical datum. Interpreting these along channel variations remains an open question because of the reasons outlined above. Nevertheless, if desired, along-channel varying hypsometry predictions can be converted in one single summarising curve (Fig. 12), which shows that also the basin hypsometry can be predicted when limited data is available.**

## RC2: 'Review', Anonymous Referee #2, 05 Apr 2018

The paper investigates the relationship between estuary planform shape and along-channel variations in hypsometry. The authors recall the definition of “ideal estuary” and assume that along-channel changes in hypsometry (e.g. changes from concave to convex hypsometry) depend on the deviation of estuarine cross-sectional width from the “ideal width” dictated by an exponentially decreasing function. The paper builds upon previous findings by the authors (Leuven et al., 2016, 2017) showing that “excess width” (with respect to the ideal width) allows one to predict the location of tidal bars within the estuary. The new finding is that concave hypsometry occurs where no bars are observed and the estuary width is close to the ideal one, whereas convex hypsometry occurs where extensive bars develop at a given location (or cross section) and estuary width is much larger than the ideal one. The paper is well written and clearly organized. It addresses a relevant issue of practical importance, particularly in view of current anthropogenic influence on estuarine morphology and dynamics. As such, it deserves credit and it will be of interest to the readership of ESurf. I have a few minor suggestions made in the effort to improve an already good paper.

*We found the review helpful and positive and thank the reviewer in the acknowledgements. Below we describe (in italics) how we used the reviewer comments to improve the manuscript.*

### General Comments

The authors use the “ideal estuary” model that is based on a set of assumptions. The authors then discuss their results by relating them to the ratio between the observed estuary width and the “ideal” width obtained by considering an exponential width variation along the estuary. As noted, the “ideal estuary” model embeds a set of assumptions that should be discussed more in detail. As an example, the authors compare “ideal” and observed widths, but then assume a linear landward decrease in channel depth, whereas the ideal model prescribes a different behavior.

*This comment relates to the third comment of reviewer 1. We now added a new section at the start of the methods section in which we discuss the assumptions of the ideal estuary in more detail, including explanation how this lead to our geometric approach and that it shouldn't be confused with the “ideal” state:*

*“A useful model to describe the morphology of estuaries is that of the 'ideal estuary'. In an ideal estuary the energy per unit width remains constant along estuarine channels. This ideal state can be met when tidal range and tidal current are constant along-channel, such that the loss of tidal energy by friction is balanced by the gain in tidal energy per unit width by channel convergence (Pillsbury, 1956; Dronkers, 2017). In case the depth is constant along the channel, the ideal estuary conditions are approximately met when the width is exponentially decreasing in landward direction (Pillsbury, 1956; Langbein, 1963; Savenije, 2006; Toffolon & Crosato, 2010; Savenije, 2015), which also implies an along-channel converging cross-sectional area. However, when depth and friction are not constant along-channel, but for example linearly decreasing in landward direction, less convergence in width is required to maintain constant energy per unit of width. Many natural estuaries are neither in equilibrium nor in a condition of constant tidal energy per unit width. They deviate from the ideal ones as result of varying degree of sediment supply, lack of time for adaptation to changing upstream conditions and sea-level rise (Townend, 2012; de Haas et al., 2017). Whether continued*

*sedimentation would reform bar-built estuaries into proper ideal estuaries remains an open question. For our application, the concept of ideal estuaries is useful to assess the degree of deviation from ideal because of the width variations observed as bars, tidal flats and saltmarsh. While we expect a somewhat different degree of convergence such that the ideal state of constant energy per unit of width is approximately maintained, we do not study the deviation of this convergence length from that in ideal estuaries.*

*Ideally, we would want to assess the degree to which an estuary is in equilibrium from an aerial photograph, because this is often the only data available. However, the only indicator derivable from aerial photography is channel width and thus deviation from a converging width profile. Therefore, in Leuven et al. (2017), we defined the excess width, which is the local width of the estuary minus our approximation of the potential ideal estuary width. Here, the ideal estuary width is approximated as an exponential fit on the width of the mouth and the width of the landward river. While the empirical measure of 'ideal width' should not be confused with the 'ideal state' of an estuary, it is the only practical way to estimate deviation from an ideal estuary based on the estuary outline only. Moreover, it proved to be a good indicator of occurring bar patterns (Leuven et al., 2017) and will therefore be applied in this paper to study hypsometries."*

*It should be noted here as well that a linear along-channel depth profile can also be a horizontal bed profile in the case that the predicted channel depth based on hydraulic geometry at the landward side and the predicted depth at the mouth based on tidal prism-CSA relations is equal. We clarified this in the text: "Width-averaged depth profiles along estuaries are often (near-) linear (Savenije, 2015; Leuven et al., 2017), which includes horizontal profiles with constant depth."*

As to the use of hypsometry, it should be better clarified, from the very beginning, that the theoretical framework is quite different from the one proposed for river basins (Strahler, 1952) and for tidal basins (Boon and Byrne, 1981) because in this case the hypsometric curve is applied across channel width (it is a cross-sectional hypsometric curve). I find the idea clever and interesting, but I'd like to see some more discussion on the reasons leading the authors to set up such an analysis. In addition, in the case of the river and tidal basin, the morphological evolution was accounted for, suggesting that different shapes of the hypsometric curve were associated to young or old systems. Is there any possibility of making such an analogy within the framework proposed by the authors? Can the framework account for the dynamic nature of estuarine landscapes? I also wonder if the framework could be applied to any type of estuary or if there are some limitations. Can micro- and macrotidal systems behave in a different way?

*We now clarified that our approach is different from classical hypsometry studies in the first paragraph of the section about the general hypsometric curve: "(...) While it is of interest to use these empirical relations to predict the occurring altitude variation of a landform, the framework here is different, because in this case the hypsometric curve is applied across channel width: it is a cross-sectional hypsometric curve that we change along the system. We aim to use the general hypsometric curve to characterise the occurring cross-sectional hypsometry, (...)".*

*We added a paragraph in the discussion about need for a physically based determination of the hypsometry, and the lack of theory available to do so, also suggested by reviewer 1. A more physics based theory for hypsometry would be required to answer the open questions proposed by the reviewer.*

Finally, I remembered of a paper proposing quite a similar analysis (Toffolon and Crosato, JCR 2017). I think the paper would benefit from recalling the results of the above paper (analyses were applied to the Scheldt estuary). In that paper, the authors analyzed the case of U-shaped, V-shaped, Y-shaped cross section. This could be done also within this framework, to predict the tendency of the estuary to develop particular shapes.

*We were aware of this paper but showed in our earlier work that their application of bar theory is flawed. Indeed, they used a similar fitting approach as we did, but (1) used a power function instead of the Strahler formulation and (2) fitted hypsometric profiles for 15 zones along the estuary and characterise their shape. The effect is that they completely smooth out all differences between bars and channel zones which is precisely the point of our paper. Their U-shaped profiles correspond to our concave profiles, Y-shaped to our convex and V-shaped is exactly intermediate. We added references to their methodology in the introduction and methods section of our paper and compare the results of both studies in the discussion.*

*Introduction: “Furthermore, hypsometry was used as a data reduction method **to characterise entire reaches spanning bars and channels in estuaries (Toffolon & Crosato, 2007)** and shapes of individual tidal bar tops (de Vet et al., 2017).”*

*Methods: “While it is of interest to use these empirical relations to predict the occurring altitude variation of a landform, the framework here is different, because in this case the hypsometric curve is applied across channel width: it is a cross-sectional hypsometric curve that we change along the system. We aim to use the general hypsometric curve to characterise the occurring cross-sectional hypsometry, which is similar to the approach of Toffolon & Crosato (2007) who fitted a power function to 15 zones along the Western Scheldt. However, the zoned approach smooths out all differences between bar complex and channel-dominated zones, which are of interest for this study.”*

*Discussion: “These findings are consistent with hypsometry zonations previously found for the Western Scheldt with more concave hypsometries in for channel-dominated morphology and more convex hypsometries for bar complex morphology (Toffolon & Crosato, 2007). Our cross-sectional approach additionally revealed quasi-periodic behaviour within these zones.”*

#### **Detailed comments**

*Detailed textual comments were mostly incorporated and sometimes used as indicator where text clarity had to be improved. We attach a PDF that highlights the changes to the first submission.*

Page 1, Line 19 change “hydrodynamical” to “hydrodynamic”  
*Corrected.*

Page 1, Line 22. It should be clarified that the loss of tidal energy by friction is balanced by the gain in tidal energy by convergence.  
*Clarified.*

Page 4, Line 5. “width” should be “with”  
*Corrected.*

Page 5, Lines 4-5. Actually, this could be the other way round: the presence of bars generates excess width.  
*Added to the sentence.*

Page 6, line 1 and line 5. I do not think there is the need to recall that “e” is Euler’s number (actually,  $e^{(-x/Lw)}$  is an exponential function) and “ln” is the natural logarithm.  
*Removed.*

Page 6, line 8. Computation of channel width at the landward limit is unclear. Please explain.  
*We added: “... and the landward width was measured between the vegetated banks.”*

Page 7, lines 16-20. These lines should be rephrased. If I understood correctly, in the first case, fitting is performed on both  $r$  and  $z$  (as in the third case with the inverted function).  
*We added “for  $r$  and  $z$ ” in this sentence: “First, a regular least-squares curve fitting was used for  $r$  and  $z$  ...”, before explaining that the results were along-channel varying for  $z$  and rather constant for  $r$ .*

Page 7, lines 25-27. Please discuss why the inverted function was used.

*We clarified that the original function does not fit well for cases where we observe steep transitions from the bar top to channel bottom: "To do so, the original formulation of Strahler (1952) was inverted to allow for hypsometries that describe steep transitions from bar top to channel bottom, because the original does not nearly fit as well"*

Page 9, lines 5-7. The linear decrease in water depth from the mouth to the landward section is an assumption that needs to be discussed (also in view of other theoretical frameworks developed for tidal channels, e.g. Toffolon and Lanzoni, JGR 2010). In addition, is such an assumption consistent with those embedded in the "ideal estuary" model?

*This comment relates to the first general comment of the reviewer as well as a comment of reviewer 1. Toffolon and Lanzoni (2010) report a constant-depth channel to form when convergence is strong, which is in agreement with the definition of an ideal estuary. We now added a section to the methods in which we clarify the definition of an ideal estuary, together with a description of how we derived a geometric property that characterises deviation from an ideal shape. We now cite this work where we give the definition.*

Page 9, equation (5). Please note that computing the tidal prism by multiplying estuary surface area by the tidal range tantamount to assume a flat water surface elevation along the estuary and moreover does not account for the fact that portions of the estuary area  $A(t)$  might get dry during the tidal cycle (see Boon, 1975).

*We added the two assumptions to the text here.*

Figure 3. This figure should be modified. In my view it is a bit confusing to use the same axes for the two columns of panels. The left column should have plots with "bed elevation" on the vertical axis, while the right one should have  $h_z$ .

*Done. The right column y-label now reads: " $h_z$ , normalised bed elevation (-)".*

Page 10, Figure 5. How was the typical profile for both cases obtained? Please clarify.

*Clarified. Sentence now reads: "Cross-sectional profiles were extracted along the centreline (Section 2.1) and were subsequently classified ..."*

Page 10, Caption of Figure 5. "disected" should be "dissected".

*Corrected.*

Page 10, line 6. "suggest" should be "suggests".

*Corrected.*

Page 12, line 7. "In general, the width at the mouth of the estuary and at the upstream estuary is close to ideal ..." shouldn't this be straightforward, due to the fact that you impose those BCs in eq. (2) to compute the ideal along-channel width? Please clarify.

*This is indeed as expected, but not straightforward when there are bars present at the chosen boundary location. We clarified this in the text now (bold parts added): "In general, the width at the mouth of the estuary and at the upstream estuary is close to ideal **by definition** and the hypsometry is concave, **except in systems with wide mouths and bars in the inlet.**"*

Page 12, lines 26-30. The reader might wonder why the predictor equation was not applied to the other two estuaries analysed in the manuscript.

*The predictor was applied to all four systems (Figure 11). Nevertheless, Figure 10 only shows the along-channel variability for two systems, which was what we meant to say. We clarified this in the text and refer to both Figure 10 and 11 now.*



Page 15 line 5. I find it difficult to support and discuss the results by citing papers that are still in review or in preparation. Please remove, provide other references or update.

*Removed reference to Kleinhans et al. (2018) and added Leuven et al. (2018) as a preprint to ESSOAr.*

# Morphology of bar-built estuaries: empirical relation between planform shape and depth distribution

Jasper R.F.W. Leuven, Sanja Selaković, and Maarten G. Kleinhans

Faculty of Geosciences, Utrecht University, PO-box 80115, 3508 TC Utrecht, The Netherlands

**Correspondence:** Jasper R.F.W. Leuven (j.r.f.w.leuven@uu.nl)

**Abstract.** Fluvial-tidal transitions in estuaries are used as major shipping fairways and are characterised by complex bar and channel patterns with a large biodiversity. Habitat suitability assessment and study of interactions between morphology and ecology therefore require bathymetric data. While imagery offers data of planform estuary dimensions, only for a few natural estuaries bathymetries are available. Here we study the empirical relation between along-channel planform geometry, 5 obtained as the outline from imagery, and hypsometry, which characterises the distribution of along-channel and cross-channel bed-levels. We fitted the original function of Strahler (1952) to bathymetric data along four natural estuaries. Comparison to planform estuary shape shows that hypsometry is concave at narrow sections with large channels, while complex bar morphology results in more convex hypsometry. We found ~~a~~ an empirical relation between hypsometric function shape and the degree to which the estuary width deviates from an ideal convergent estuary, which is calculated from river width and mouth 10 width. This implies that the occurring bed level distributions depend on inherited Holocene topography and lithology. Our new empirical function predicts hypsometry and along-channel variation in intertidal and subtidal width. Combination with the tidal amplitude allows an estimate of inundation duration. A validation of the results on available bathymetry shows that predictions of intertidal and subtidal area are accurate within a factor 2 for estuaries of different size and character. Locations with major human influence deviate from the general trends, because dredging, dumping, land reclamation and other engineering mea- 15 sures cause local deviations from the expected bed-level distributions. The bathymetry predictor can be used to characterise and predict estuarine subtidal and intertidal morphology in data-poor environments.

*Copyright statement.* Author(s) 2018. This work is distributed under the Creative Commons Attribution 4.0 License.

## 1 Introduction

Estuaries develop as a result of dynamic interactions between ~~hydrodynamical~~ hydrodynamic conditions, sediment supply, 20 underlying geology and ecological environment (Townend, 2012; de Haas et al., 2017). One model for the resulting morphology is that of the ~~'ideal estuary'~~ 'ideal estuary' that is hypothesised to have along-channel uniform tidal range, constant depth and current velocity, and a channel width that exponentially converges in landward direction such that the loss of tidal energy by friction is balanced (~~Savenije, 2006; Townend, 2012; Savenije, 2015; Dronkers, 2017~~) by the gain in tidal energy by

[convergence \(Savenije, 2006; Townend, 2012; Savenije, 2015; Dronkers, 2017\)](#). One would expect that in this case the along-channel variation in hypsometry is also negligible. However, natural estuaries deviate from the ideal ones as result of varying degree of sediment supply, lack of time for adaptation and sea-level rise (Townend, 2012; de Haas et al., 2017) and locations wider than ideal are filled with tidal bars (Leuven et al., 2017) (Fig. 1). Differences in bed-level profiles between ideal and non-ideal estuaries are further enhanced by damming, dredging, dumping, land reclamation and other human [engineering interference](#) (e.g. O'Connor, 1987; Wang and Winterwerp, 2001; Lesourd et al., 2001; Jeuken and Wang, 2010; Wang et al., 2015). All these natural deviations from the ideal estuary mean that there is no straightforward relation between the planform geometry of the estuary and the hypsometry or distribution of depths.

Hypsometry captures key elements of geomorphological features ([Strahler, 1952; Boon and Byrne, 1981; Dieckmann et al., 1987; Kirby](#)) The hypsometric method was developed by Strahler (1952) and Boon and Byrne (1981) to relate planform area of a basin to elevation. Later the results were used to predict the influence of basin morphology on the asymmetry of the horizontal and vertical tides, to predict flood- or ebb-dominance and maturity of an estuary (Boon and Byrne, 1981; Wang et al., 2002; Moore et al., 2009; Friedrichs, 2010) and to characterise the trend of saltmarsh development (Gardiner et al., 2011; Hu et al., 2015). Furthermore, hypsometry was used as a data reduction method to characterise [morphology zones in estuaries](#) ([Toffolon and Crosato, 2007](#)) and shapes of tidal bars (de Vet et al., 2017). Hypsometry has also been used to describe dimensions of channels and tidal flats in an idealised model (Townend, 2010). Here, a parabolic shape was prescribed for the low water channel, a linear profile for the intertidal low zone and convex profile for the intertidal high zone. While these profiles are valid for perfectly converging channels, it is unknown to which extent they are applicable to estuaries with irregular planforms and whether the currently assumed profiles are valid to assess flood- or ebb-dominance. Hypsometric profiles and derived inundation duration are also relevant indicators for habitat composition and future transitions from mudflat to saltmarsh (Townend, 2008). In order to predict and characterise morphology and assess habitat area, we need along-channel and cross-channel bed-level predictions for systems without measured bathymetry (Wolanski and Elliott, 2015).

For only a few natural estuaries bathymetry is available, which leaves many alluvial estuaries with irregular planforms from all around the world underinvestigated. However, many are visible in detail on satellite imagery, which raises the question whether there is a relation between planform geometry and depth distribution. Such a relation is known to exist in rivers in the form of hydraulic geometry depending on bar pattern, and meander pool depths depending on planform channel curvature (e.g. Kleinhans and van den Berg, 2011; van de Lageweg et al., 2016). It therefore seems likely that such a relation between the horizontal and vertical dimensions exists for sandy estuaries, but this is not reported in literature. Morphological models can simulate 3D bed-levels with considerable accuracy (van der Wegen and Roelvink, 2008, 2012; van Maren et al., 2015; Braat et al., 2017), but these models are computationally intensive and need calibration and specification of initial and boundary conditions. To study unmapped systems with limited information, it would be useful to be able to estimate bed-level distributions from planform geometry. Here we investigate this relation.

Previously, we showed in Leuven et al. (2017) how locations and widths of tidal bars can be predicted from the excess width, which is the local width of the estuary minus the ideal estuary width. The summed width of bars in each cross-section was found to approximate the excess width. This theory describes bars as discrete recognisable elements truncated at low water

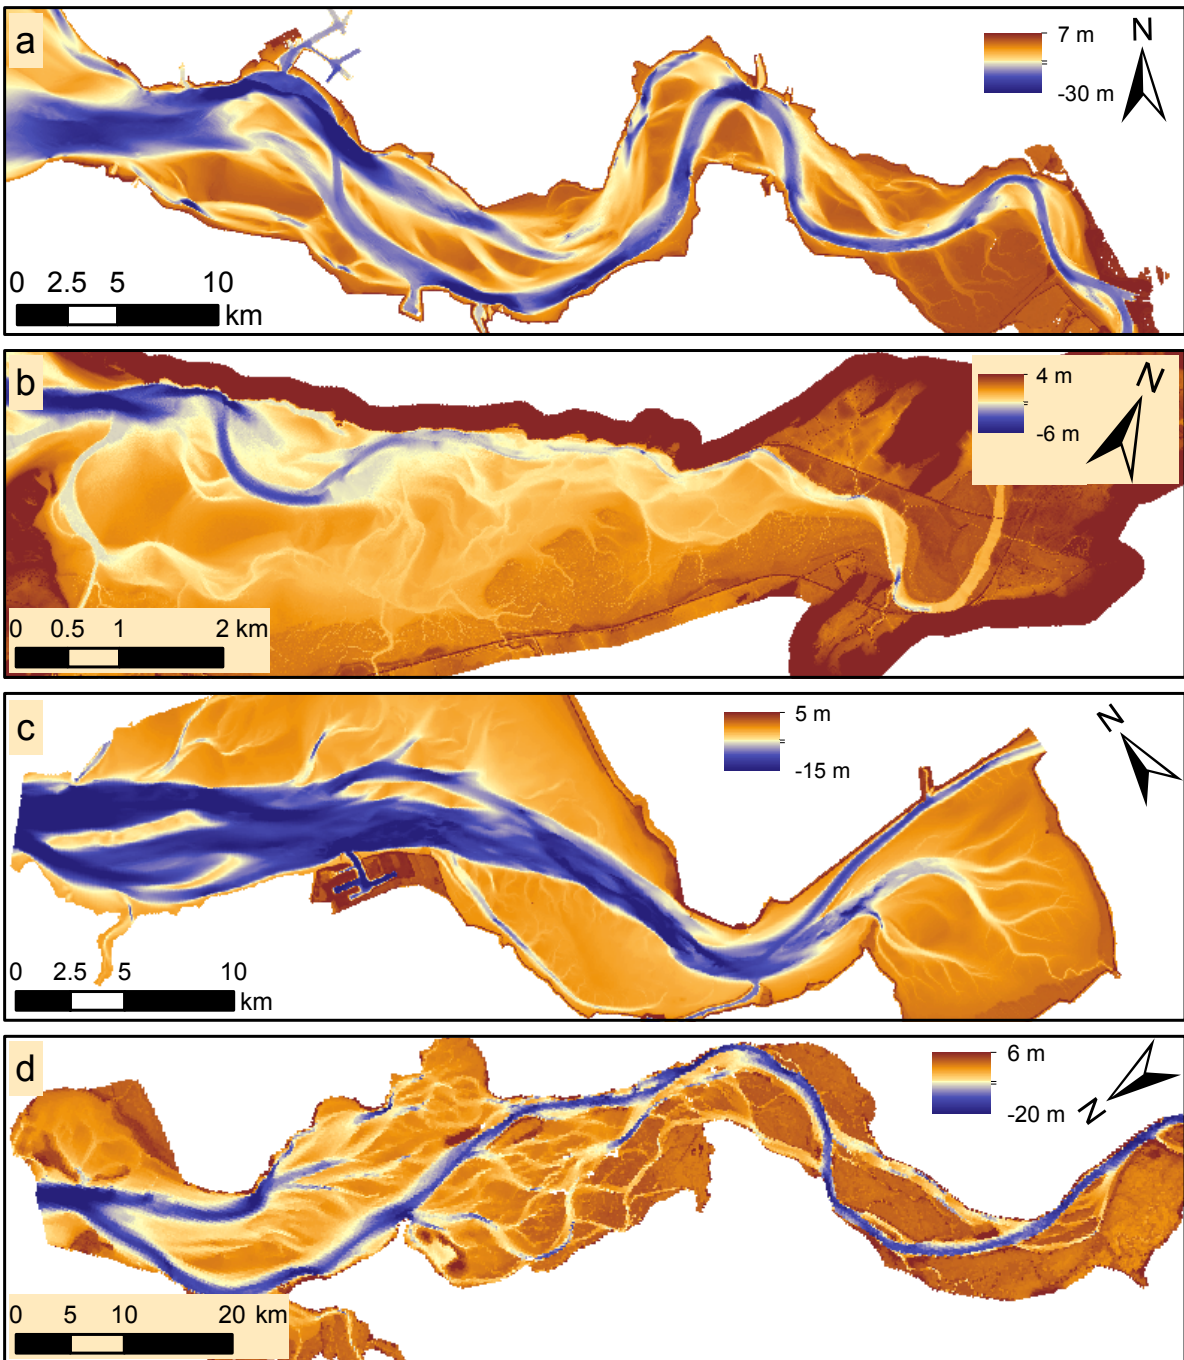

**Figure 1.** Bathymetry from (a) the Western Scheldt (NL), (b) Dovey (Wales), (c) Eems (NL) and (d) Columbia River estuary (USA). Source: (a,c) Rijkswaterstaat (NL), (b) Natural Resources Wales, (d) Lower Columbia Estuary Partnership.

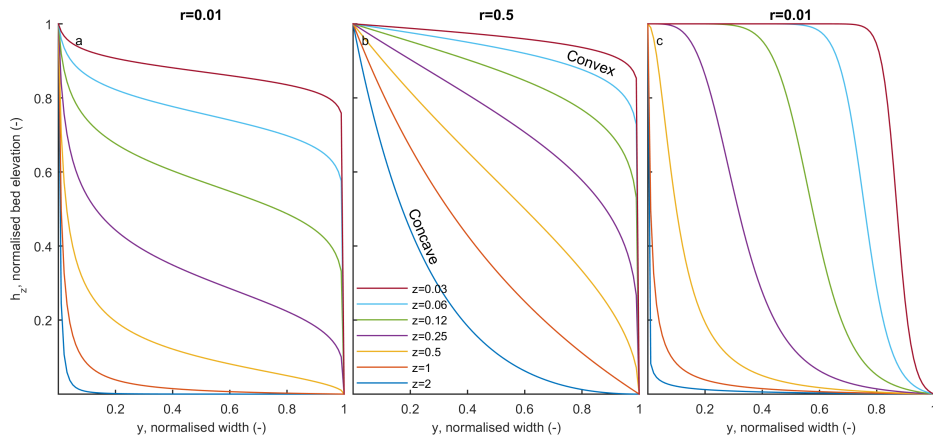

**Figure 2.** Hypsometric functions to describe morphological systems, modified from Strahler (1952). (a,b) Effect of  $z$ -values with  $r$ -value kept constant. (c) Inverted Strahler function (see Eq. 4).

level on what is essentially a continuous field of bed elevation that changes in along-channel direction (Leuven et al., 2016). However, predicting morphology in more detail requires predictions of along-channel and cross-channel bed elevations. While hypsometry can summarise bed elevation distribution as a cumulative profile, it is not clear whether the shape of the profile is predictable. Our hypothesis is that the along-channel variation in hypsometry depends on the degree to which an estuary deviates from its ideal shape. Therefore, we expect that locations with large excess width and thus large summed width of bars have a more convex hypsometry (Fig. 3c,d). In case of ideal estuary width-with (almost) no bars (Fig. 3a,b), we expect concave hypsometry.

The aim of this manuscript is to investigate the relation between estuary planform outline and along-channel variation in hypsometry. To do so, first hypsometric curves are used to summarise the occurring bed elevations in a cumulative profile. Then, we use the original function of Strahler (1952) to fit the data obtained from bathymetry of four estuaries (Fig. 1). In the results, we develop an empirical function to predict hypsometry. The quality and applications of the predictor are assessed in the discussion.

## 2 Methods

In this section, first the definition of an ideal estuary is given with a description of how we derived a geometric property that characterises deviation from an ideal shape. Second, the general form of a hypsometric curve is described. SecondThen, the available datasets that were used for curve fitting are given. Last, the methodology to fit a hypsometric function to bathymetry in systems is presented.

### 2.1 Deviation from 'ideal'

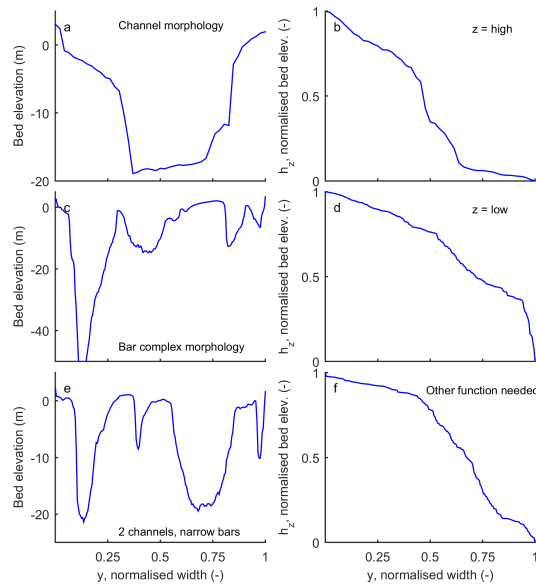

**Figure 3.** Example cross-sections and hypsometry, suggesting that channel-dominated morphology (a,b) generally results in concave hypsometric functions (high  $z$ -value in Fig. 2) while bar complexes (c,d) generally result in convex hypsometry (low  $z$ -value in Fig. 2). In case of narrow bars with a flat top and relatively steep transition from bar top to channel, the original hypsometry function by Strahler (1952) is less appropriate and the inverted function fits better.

A useful model to describe the morphology of estuaries is that of the 'ideal estuary'. In an ideal estuary the energy per unit width remains constant along estuarine channels, which is a condition that can be met when tidal range and tidal current are constant along-channel, such that the loss of tidal energy by friction is balanced by the gain in tidal energy per unit width by channel convergence (Pillsbury, 1956; Dronkers, 2017). In case the depth is constant along the channel, the ideal estuary conditions are approximately met when the width is exponentially decreasing in landward direction (Pillsbury, 1956; Langbein, 1963; Savenije, 2006; Toft 5 which also implies an along-channel converging cross-sectional area. However, when depth and friction are not constant along-channel, but for example linearly decreasing in landward direction, less convergence in width is required to maintain constant energy per unit of width. Many natural estuaries are neither in equilibrium nor in a condition of constant tidal energy per unit width. They deviate from the ideal ones as result of varying degree of sediment supply, lack of time for adaptation and sea-level rise (Townend, 2012; de Haas et al., 2017). For the concept of ideal estuaries, this implies that a somewhat different 10 degree of convergence would be required to maintain the condition of constant energy per unit of width.

Ideally, we would want to assess the degree to which an estuary is in equilibrium from an aerial photograph, because this is often the only data available. However, the only indicator derivable from aerial photography is channel width and thus deviation from and ideal converging width profile. Therefore, in Leuven et al. (2017), we defined the excess width, which is the local width of the estuary minus the ideal estuary width. The ideal estuary width was defined as an exponential fit on the width of 15 the mouth and the width of the landward river. While the measure of 'ideal width' should not be confused with the 'ideal state'

of an estuary as described above, it is the only way to estimate deviation from an ideal estuary based on the estuary outline only. Moreover, it proved to be a good indicator of occurring bar patterns and will therefore be applied in this paper to study occurring hypsometries.

## 2.2 General hypsometric curve

5 In the past, multiple authors have proposed empirical relations for the hypsometric shape of terrestrial landscapes (Strahler, 1952) and (partially) submerged bodies (Boon and Byrne, 1981; Wang et al., 2002; Toffolon and Crosato, 2007; Townend, 2008) (see Townend, 2008). All equations, except for Wang et al. (2002), predict a fairly similar hypsometric curve based on the volume and height range of the landform (Townend, 2008). While it is of interest to use these empirical relations to predict the occurring altitude variation of a landform, the framework here is different, because in this case the hypsometric curve is applied across channel width: it is a cross-sectional hypsometric curve that we change along the system. We aim to use the general hypsometric curve to characterise the occurring cross-sectional hypsometry, which is similar to the approach of Toffolon and Crosato (2007) who fitted a power function to 15 zones along the Western Scheldt. However, the zoned approach smooths out all differences between bar complex and channel-dominated zones, which are of interest for this study. To that end, it is less relevant for which environment the hypsometric relation was proposed, as long as it is capable to describe the range of occurring hypsometries. For the case of the estuarine environment (Fig. 3), the hypsometric curve should be able to describe variations in concavity and variations in the slope of the curve at the inflection point. Here we use the original Strahler (1952) formulation, which is capable to do so, but in principle any equation that fits well could be used.

Strahler (1952) formulated the general hypsometric curve as:

$$h_z = \left[ \frac{r}{r-1} \right]^z \left[ \frac{1}{(1-r)y+r} - 1 \right]^z \quad (1)$$

20 in which  $h_z$  is the value of the bed elevation, above which fraction  $y$  of the width profile occurs. In other words,  $h_z$  is the proportion of total section height and  $y$  the proportion of section width.  $r$  sets the slope of the curve at the inflection point in a range of 0.01-0.50, with sharper curves for lower values of  $r$  (Fig. 2a,b).  $z$  determines the concavity of the function in a range of 0.03-2, with lower values giving a more convex profile and higher values giving a more concave profile (Strahler, 1952) (Fig. 2). Our approach changes the original definition of  $r$  and  $z$  to make them fitting parameters. It is expected that  $z$ -values depend on excess width, because the fraction of the width occupied by bars becomes larger with excess width, resulting in a more convex hypsometric profile (Fig. 3c,d), or the presence of bars generates excess width.

Excess width is defined as the local width minus the ideal width, which is given by:

$$W_{ideal}(x) = W_m \cdot e^{-x/L_w} \quad (2)$$

**Table 1.** Characteristics of estuaries used in this study.

|                 | $h_m$ (m) | $h_r$ (m) | $W_m$ (m) | $W_r$ (m) | $2a$ (m) | Area ( $km^2$ ) | % intertidal | $Q_r$ ( $m^3 s^{-1}$ ) |
|-----------------|-----------|-----------|-----------|-----------|----------|-----------------|--------------|------------------------|
| Western Scheldt | 25        | 15        | 4500      | 350       | 5        | 300             | 20           | 100                    |
| Columbia river  | 40        | 20        | 4000      | 800       | 2.5      | 900             | 30           | 7000                   |
| Dovey           | 10        | 2         | 450       | 50        | 3        | 12              | 75           | 30                     |
| Eems            | 25        | 8         | 3500      | 350       | 3.5      | 260             | 30           | 80                     |

in which  $x$  is the distance from the mouth,  $W_m$  the width of the mouth,  $e$  is  $\approx 2.7$  and  $L_W$  is the width convergence length (Davies and Woodroffe, 2010), which can be obtained conservatively from a fit on the width of the mouth and the landward river width (Leuven et al., 2017):

$$L_W = -s \frac{1}{\ln\left(\frac{W_s}{W_m}\right)} \quad (3)$$

- 5 in which  ~~$\ln$  is the natural logarithm~~,  $W_m$  is the local width measured at the mouth of the estuary,  $W_s$  is the width measured at the landward side of the estuary and  $s$  is the distance between these locations measured along the centreline. This practical method makes the convergence length somewhat sensitive to the selected position of the seaward and landward limit.

The landward limit was selected where the width ceases to converge on an image at the resolution of the full estuary scale and the landward width was measured between the vegetated banks. The seaward limit was selected as the location with the minimum width in case bedrock geology, human engineering or a higher elevated spit confined the mouth, because in these cases the minimum width limits the inflow of tidal prism. In other cases, the mouth was chosen at the point where the first tidal flats were observed in the estuary or where the sandy beach ends at the mouth of the estuary. However, when the mouth is chosen at a location where sand bars are present, the ideal width will be overestimated and the width of intertidal area underestimated. It is therefore recommended to either chose the mouth at a location where bars are absent or subtract the width of bars from the measured with at the mouth to obtain the ideal width profile.

### 2.3 Data availability and classification

Detailed bathymetries were available for four systems: the Western Scheldt (NL), Dovey (Wales), Eems (NL) and the Columbia River estuary (USA) (Fig. 1, Table 1). Data for the Western Scheldt and Eems were obtained from Rijkswaterstaat (NL), for the Dovey estuary from Natural Resources Wales and for the Columbia River estuary from the Lower Columbia Estuary Partnership. Bed elevations were extracted from these bathymetries as follows. First, the estuary outline was digitised, excluding fully developed saltmarshes, and subsequently a centreline was determined within this polygon (following the approach of Leuven et al., 2017). Bed elevations were collected on equally spaced transects perpendicular to the centreline of the estuary. The data extracted at these transects was subsequently sorted by bed level value and made dimensionless to obtain hypsometric profiles (see Fig. 3 for examples).

25 We classified the transects by morphological characteristics and potential susceptibility to errors. The following morphological classes were used: mouth, bar junction, bar complex, narrow bar, pointbar, channel, pioneer marsh. The mouth is the



location where the estuary transitions into the sea. A bar junction is the most seaward or most landward tip of tidal bars. A bar complex is a location where a large bar is dissected by barb channels (Leuven et al., 2016) or multiple smaller bars are present. Narrow bar is used when the bars present were narrow along their entire length and often also relatively flat on their top. Pointbar is a bar in the inner bend of a large meander. Channel was assigned when bars were largely absent. Pioneer marsh was assigned when aerial photographs or bathymetry gave visual indications of initial marsh formation, such as the presence of small tidal creeks and pioneering vegetation. Fully developed marsh is excluded from the outline.

The following classes were used to indicate possible errors: presence of harbours, major dredging locations, presence of a sand spit, presence of drainage channels for agriculture, constraints by hard layers, human engineering works. Either a locally deep channel or scour occurred at one of the sides of these transects or they lacked a natural transition from channel to estuary bank, thus ending in their deepest part on one side of the transect. Major dredging locations have unnaturally deeper channels and shallower bars, resulting in a hypsometric shape that is relatively flat in the highest and lowest part and is steep in between (Fig. 3e,f). Furthermore, in a few cases side channels were perpendicular to the orientation of the main channel of the estuary. This resulted in transects being along-channel of these side channel, which biases transect data towards larger depth and creates a flat hypsometric profile at the depth of the side channel.

## 2.4 Data processing

Least-squares fits resulted in optimal values of  $z$  and  $r$  in Eq. 1 (Fig. 2) for each transect, using three different approaches. First, a regular least-squares curve fitting was used [for  \$r\$  and  \$z\$](#) , which resulted in along-channel varying values for  $z$ , but an almost entirely constant along-channel value for  $r$  of 0.5 (Fig. 4b,c, solid lines). In the second approach we set  $r$  to a constant value of 0.5 and only fitted to obtain  $z$  (Fig. 4c, dashed line). We found that the quality of the fit was the same, as indicated by the root-mean-square error (RMSE) (Fig. 4d) and therefore apply this second approach in the remainder of this paper.

Locations where the RMSE was relatively large correspond to locations where major dredging occurred in the past century. This possibly resulted in a hypsometry characterised by a larger fraction of the width occupied by high tidal flats, a larger fraction of the width occupied by deep channels and a smaller fraction of the width occupied by the zone between channels and bars (Fig. 3e,f). Because the hypsometric curve at these locations deviated from the original Strahler function (Eq. 1), our third approach was to apply a modified function to find optimal values for  $z$  and  $r$ . To do so, the original formulation of Strahler (1952) was inverted to allow for hypsometries that describe steep transitions from bar top to channel bottom, [because the original does not nearly fit as well](#):

$$h_{z,inv} = \frac{\left[ \frac{y^{1/z}(1-r)}{r} + 1 \right]^{-1} - r}{1-r} \quad (4)$$

Applying this modified function resulted in better fits, but only at locations that were classified to be excluded because of possible errors. Therefore, results from this approach are not shown here and it is suggested to study the effect of dredging and dumping on hypsometry in more detail in future studies.

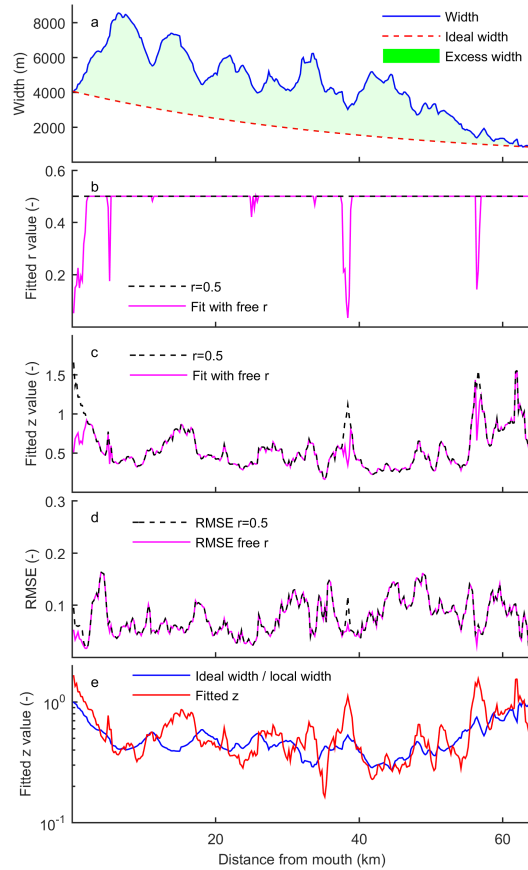

**Figure 4.** (a) Width along the Western Scheldt, with the maximum ideal converging width profile indicated. The green area is defined as the excess width (Leuven et al., 2017). For each along-channel transect of the estuary, the optimal fit of  $z$  and  $r$  in the Strahler (1952) function (Fig. 2) was determined. (b,c) Results for the Western Scheldt when both  $z$  and  $r$  are freely fitted as well as the results when  $r$  is fixed to a constant value of 0.5. (d) Quality of fits remains about the same when  $r$  is set to a fixed value of 0.5 as indicated by the root-mean-square error (RMSE). (e) Fitted  $z$ -values show similar trends as the ideal width divided by local width.

In principle, both the bed elevation ( $h_z$ ) and the width fraction  $y$  in Eq. 1 are dimensionless. To compare the resulting predictions with measured values, the prediction needs to be dimensionalised. Values for  $y$  are scaled with the local estuary width. We test three options to scale  $h_z$ . The first option is to scale  $h_z$  between the highest bed elevation and lowest bed elevation in the given cross-section, which is sensitive to the precise cut-off of the bathymetry. The second option is to scale  $h_z$  between the local high water level (HWL) and the maximum estuary depth in that cross-section, which is sensitive to bathymetric information that is usually not available in unmapped estuaries.

The third option requires a prediction of depth at the upstream or downstream boundary. Width-averaged depth profiles along estuaries are often (near-) linear (Savenije, 2015; Leuven et al., 2017), [which includes horizontal profiles with constant depth](#). Therefore, only the channel depth at the mouth of the estuary and at the upstream river have to be estimated and subsequently a linear regression can be made. Channel depth at upstream river ( $h_r$ ) is estimated with hydraulic geometry relations (e.g. Leopold and Maddock Jr, 1953; Hey and Thorne, 1986):  $h_r = 0.12W_r^{0.78}$ . The depth at the mouth is estimated from relations between tidal prism and cross-sectional area (e.g. O'Brien, 1969; Eysink, 1990; Friedrichs, 1995; Lanzoni and D'Alpaos, 2015; Gisen and Savenije, 2015; Leuven et al., 2017). Here we used:

$$h_m = \frac{0.13 \cdot 10^{-3} P}{W_m} \quad (5)$$

in which  $P$  is the tidal prism, which can be estimated by multiplying the estuary surface area with the tidal range (Leuven et al., 2017); [this assumes a flat water surface elevation along the estuary and neglects portions of the estuary that might get dry during the tidal cycle \(Boon, 1975\)](#). Locally, the maximum depth may be deeper or lower than predicted, due to the presence of resistant layers in the subsurface or where banks are fixed or protected. While this may affect the accuracy of the locally predicted maximum channel depth, it has a minor effect on the calculations of sub- and intertidal area. Moreover, the upper limit for dimensionalisation is chosen as the high water line, which implies that supratidal area is not included in the predictions. We will show results with all methods, but only the third can be applied when information about depth is entirely lacking.

Statistical analyses in the remainder of paper were approached as follows. In linear regressions, we minimised residuals in both the x- and y-directions. This results in regressions that are more robust than when residuals in only one direction are minimised. In case regressions are plotted, the legend will specify the multiplication factor that the confidence limits plot above or below the trend.  $R^2$  values are given to indicate the variance around the regression. In cases where the quality of correlation of two along-channel profiles is assessed, we used the Pearson product-moment correlation coefficient ( $r$ ).

### 3 Results

We found a strong relation between along-channel variation in hypsometry and the degree to which an estuary deviates from its ideal shape. Below, we will first show how the hypsometry of typical channel deviates from that of bar complexes. Subsequently, the data is presented per system, classified on their morphology and potential for errors due to human interference,

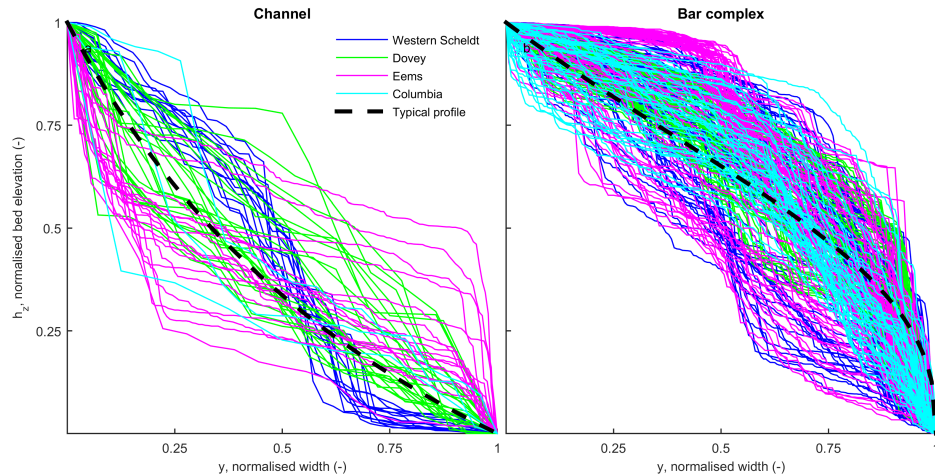

**Figure 5.** Hypsometric curves as extracted from bathymetry in the Western Scheldt, Dovey, Eems and Columbia River. **Profiles** Cross-sectional profiles were extracted along the centreline (Section 2.3) and were subsequently classified as channel when sand bars were (mostly) absent and as bar complex when one larger bar dissected by barb channels or multiple smaller bars were present. Channel-dominated morphology generally results in concave hypsometric profiles and bar complexes in convex profiles.

method and other causes. Then we combine all data to derive an empirical formulation to predict hypsometry. Last, we apply this formulation to predict the along-channel variation in intertidal and subtidal width and validate the results with measurements from bathymetry.

### 3.1 Relation Empirical relation between morphology and hypsometry

5 As hypothesised, it is indeed observed that channel-dominated morphology results in more concave hypsometry profiles (high  $z$ -value), while bar complex morphology results in more convex hypsometry (low  $z$ -value) (Fig. 5). Values for  $z$  in Eq. 1 range from 0.83 to 1.14 for channels, with an average value of 1.0. In contrast,  $z$  ranges from 0.36 to 0.41 for bar complexes, with an average of 0.39.

10 Clustering of morphological classes strongly suggest suggests a relation between hypsometry and planform estuary shape (Fig. 6). Mouth and channel-dominated morphology typically plot at the right-hand side of the plots in Fig. 6a,c,e,g, thus being locations close to ideal width. In case of the Western Scheldt this results in the highest values of  $z$ . In the case of the Dovey and Columbia River, the mouth region was influenced by respectively a spit and human engineering, which resulted in the formation of tidal flats on the side and thus lead to a lower  $z$ -value.

15 Bar complexes occur at the other end of the spectrum; these locations are generally much wider than the ideal shape and are characterised with hypsometries with a  $z$ -value well below 1. Bar junctions as well as narrow bars are generally found at the transition from channel-dominated morphology to bar complex morphology and therefore also occur between these types in the plots. The point bar in the Western Scheldt (the *Plaat van Ossensisse*) shows hypsometry comparable to bar complexes

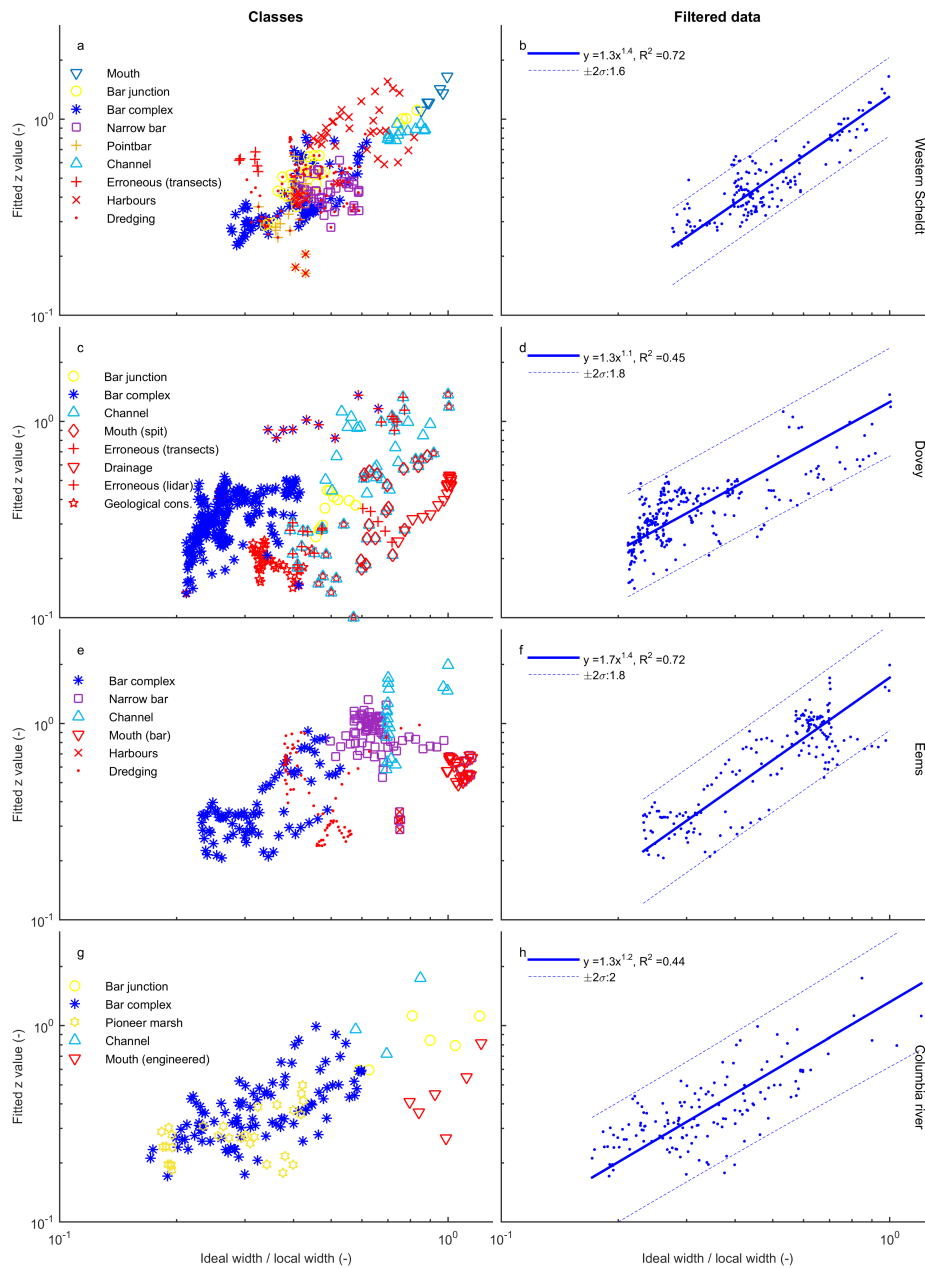

**Figure 6.** Results of hypsometry fitting, where clustering indicates a relation to planform geometry. (a,c,e,g)  $z$ -values were fitted for cross-channel transects in bathymetry of four estuaries and plotted by morphological classification. (b,d,f,h) Regressions for  $z$ -value as a function of ideal width divided by local width. Data points that were influenced by human interference, bedrock geology or errors in methodology or data indicated in red in panels a,c,e,g were excluded. Confidence limits are plotted at two standard deviations above and below the regression and their multiplication factor compared to the trend is given in the legend.

(Fig. 6a), which reflects the complex history of formation by multiple bar amalgamations. Also the locations in the Columbia River where pioneer marsh is present, show the same trend as the locations where unvegetated bar complexes occur (Fig. 6g).

In a few cases, the transects used to extract bathymetry were not perpendicular to the main channel of the estuary. For example, landward and seaward of the pointbar in the Western Scheldt (*Plaat van Ossensisse*) transects were inclined, covering  
5 a larger part of the channel than perpendicular transects, resulting in higher  $z$ -values as a consequence of the apparent channel-dominated morphology. Immediately landward of the spit in the Dovey, transects are almost parallel to the shallow side-channel. Fitting hypsometry at these locations resulted in relatively low  $z$ -values, because it is a relatively shallow side-channel.

For the Western Scheldt and Eems it is known at which locations major dredging and dumping takes place (e.g. Swinkels et al., 2009; Jeuken and Wang, 2010; Bolle et al., 2010; Dam et al., 2015; Plancke and Vos, 2016). Even though the resulting  
10  $z$ -values at these locations do not cause major outliers, the quality of fits are typically lower and the inverted Strahler function (Eq.4) fitted better. These points were therefore excluded from further analysis.

The filtered data shows quasi-cyclicity in along-channel hypsometry (Fig. 7). In general, the width at the mouth of the estuary and at the upstream estuary is close to ideal and the hypsometry is concave, except in systems with wide mouths and bars in the inlet. The part in between is characterised by variations in the local width and therefore gradual increases and decreases in the  
15 ratio between local width and ideal width. In some cases, quasi-cyclic loops are visible (e.g. Fig. 7c) caused by the asymmetry in bar complexes. In other cases, the points show more zigzag or clustered patterns, which indicate minor variation on the bar complexes or scatter in the fit applied to the bathymetry.

### 3.2 Hypsometry predictor

The relations between excess width and hypsometric function are similar for all estuaries, which suggest that a universal  
20 function is of value. Combining all the filtered data resulted in a regression between the extent to which an estuary deviates from the ideal shape and the predicted  $z$ -value in the hypsometry formulation (Fig. 8). Data from Columbia River, Eems in 1985, Western Scheldt in 2013 and Dovey were used to obtain this relation. Other data are shown in Fig. 8 but not used in the regression.

These results mean that we found a predictive function for hypsometry, where  $r$  is set to a constant value of 0.5 and the  $z(x)$   
25 is calculated as:

$$z(x) = 1.4 \left[ \frac{W_{ideal}(x)}{W(x)} \right]^{1.2} \quad (6)$$

in which  $W_{ideal}(x)$  is the ideal estuary width (Eq. 2) and  $W(x)$  is the measured local width. The confidence limits of the regression plot a factor 1.9 higher and lower than the regression, which indicates that the  $z$ -value can be predicted within a factor 2 (see Fig. 9 for an example of prediction with uncertainty). While not used in the regression, hypsometry from  
30 bathymetry in other years show similar trends and scatter as the data used in the regression.

The predictor (Eq. 6) was applied to the Columbia River estuary ~~and Western Scheldt~~, Western Scheldt, Dovey and Eems to check the quality of the resulting along-channel predictions of intertidal high, intertidal low and subtidal width (Fig. 10, Fig. 11). These zones can be derived after dimensionalising hypsometry and imposing a tidal range (Fig. 9b). For almost the

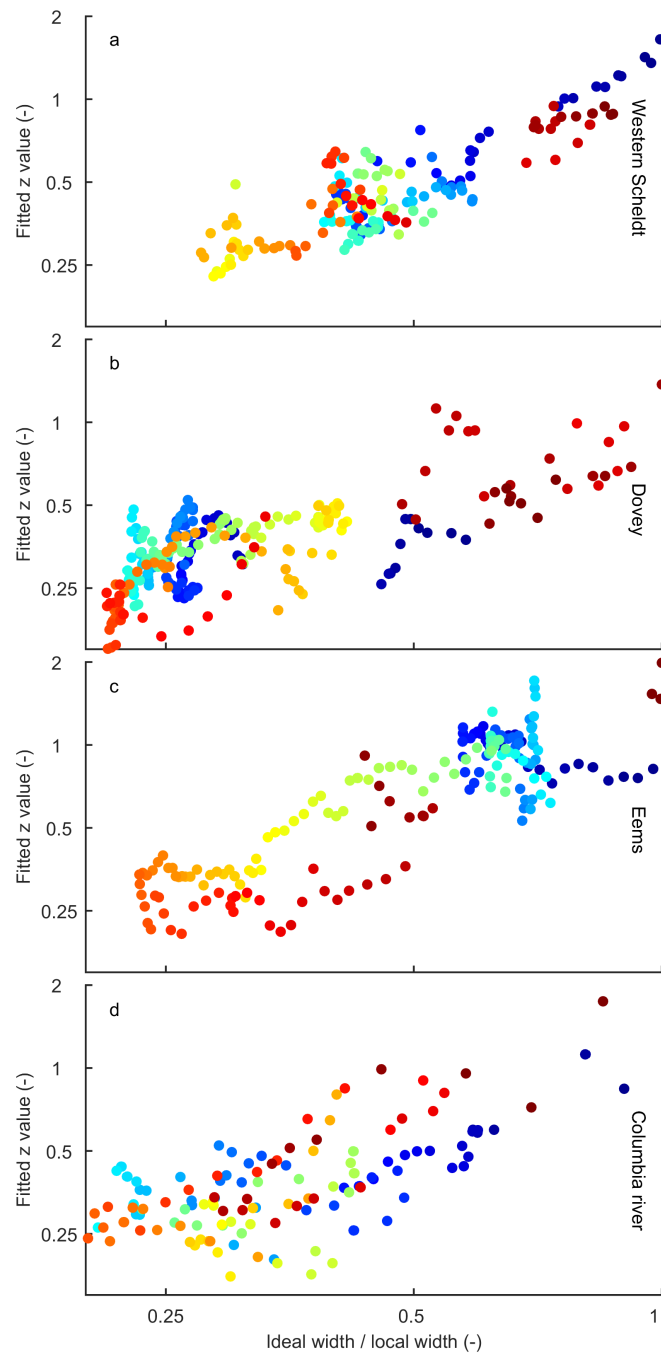

**Figure 7.** Fitted  $z$ -values as a function of deviation from the ideal width. Colours indicate the location along the estuary, with dark blue colours at the mouth transitioning into dark red colours at the landward end. Some zones show scatter in fitted  $z$ -values, while some other zones (e.g. green to orange to red in c) show quasi-periodic behaviour.

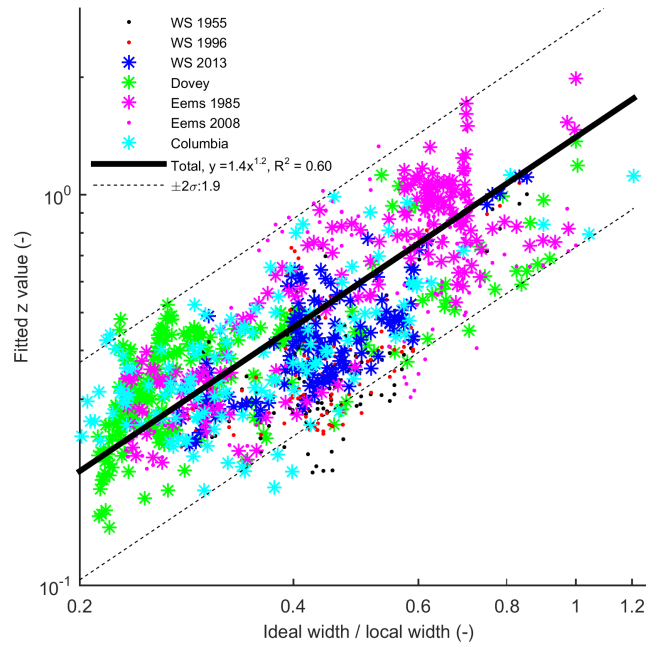

**Figure 8.** Fitted  $z$ -values of filtered data increase with the fraction of ideal width and local width, which indicate that hypsometric shapes become progressively more concave when the local width approaches the ideal width and become more convex when the local width becomes larger than the ideal width (i.e. the excess width increases). The data shown as asterisks is used for the regression. Confidence limits are plotted at two standard deviations above and below the regression and their multiplication factor compared to the trend is given in the legend.

**Table 2.** Percentage of points predicted within a factor 2 from the measured value.

| Estuary         | % for subtidal | % for intertidal |
|-----------------|----------------|------------------|
| Western Scheldt | 100            | 84               |
| Columbia river  | 90             | 79               |
| Dovey           | 54             | 71               |
| Eems            | 91             | 59               |

entire along-channel profile, the predictions are within a factor 2 of the measured value (Fig. 11) and best agreement was obtained when the hypsometry was dimensionalised between the minimum and maximum measured bed level for each transect (Fig. 10).

#### 4 Discussion

- Results from this study illustrate that bed level distributions of channel and bar patterns in estuaries are topographically forced. The estuary outline that is observable from the surface translates into the three dimensional patterns below the water surface.



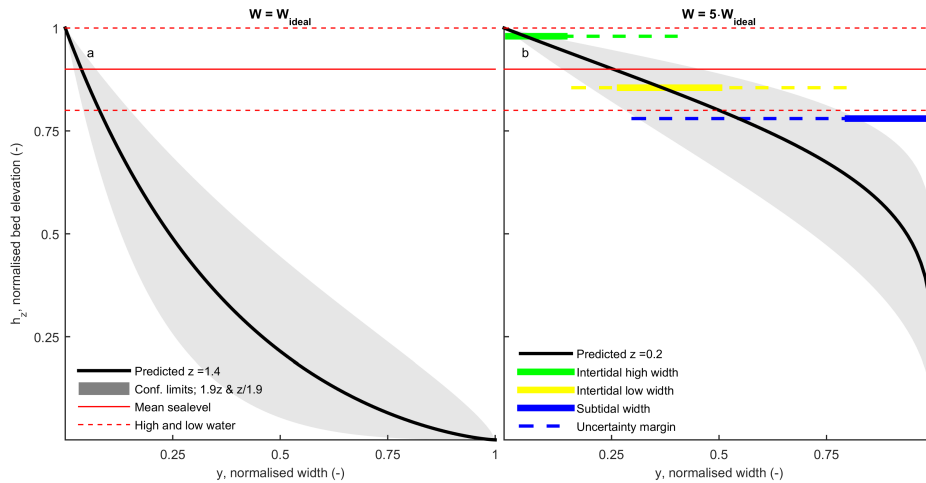

**Figure 9.** Illustration of uncertainty of predicted hypsometry from Eq. 6 with uncertainty margins (Fig. 8). Resulting prediction for hypothetical location where (a) local width is equal to the ideal width and (b) local width is five times larger than the ideal width. Results are compared against a typical tidal range in order to show uncertainty of predicted intertidal high width, intertidal low width and subtidal width as a fraction of the total estuary width.

Bar built estuaries typically have a quasi-periodic planform (Leuven et al., 2017), in which major channel confluences occur at locations where the estuary is close to its ideal shape (Kleinhans et al., 2018; Leuven et al., 2018) (Leuven et al., 2018). The parts between the confluences are typically filled with intertidal bar complexes. These findings are consistent with hypsometry zonations previously found for the Western Scheldt with more concave hypsometries in for channel-dominated morphology and more convex hypsometries for bar complex morphology (Toffolon and Crosato, 2007). Our cross-sectional approach additionally revealed quasi-periodic behaviour within these zones.

In contrast to an empirical description, ideally, a physics-based determination of the hypsometry would be favourable. However, with the current state of the art of bar theory (Leuven et al., 2016) and relations for intertidal area, tidal prism, cross-sectional area and flow velocities (O'Brien, 1969; Friedrichs and Aubrey, 1988) it is not yet possible to derive a theoretical prediction of hypsometry. For example, bar theory (Seminara and Tubino, 2001; Schramkowski et al., 2002) could predict occurring bar patterns on top of an (ideal) estuary shape, but current theories overpredict their dimensions (Leuven et al., 2016) and it is still impossible to scale these to bed level variations, because the theories are linear. In addition to that, the resulting predictions would need to meet the requirement that the predicted bed levels and the intertidal area together lead to hydrodynamic conditions that fit the estuary as well.

Previously, hypsometry was used to summarise the geometry of entire tidal basins or estuaries (Boon and Byrne, 1981; Dieckmann et al., 1987; Townend, 2008), ~~but this may be an oversimplification for~~. The whole system descriptions are consistent with the original Strahler (1952) concept of a basin hypsometry based on plan area, which is a valid description in a landform context. However, these descriptions oversimplify the along-channel variability in estuaries that are relatively long.

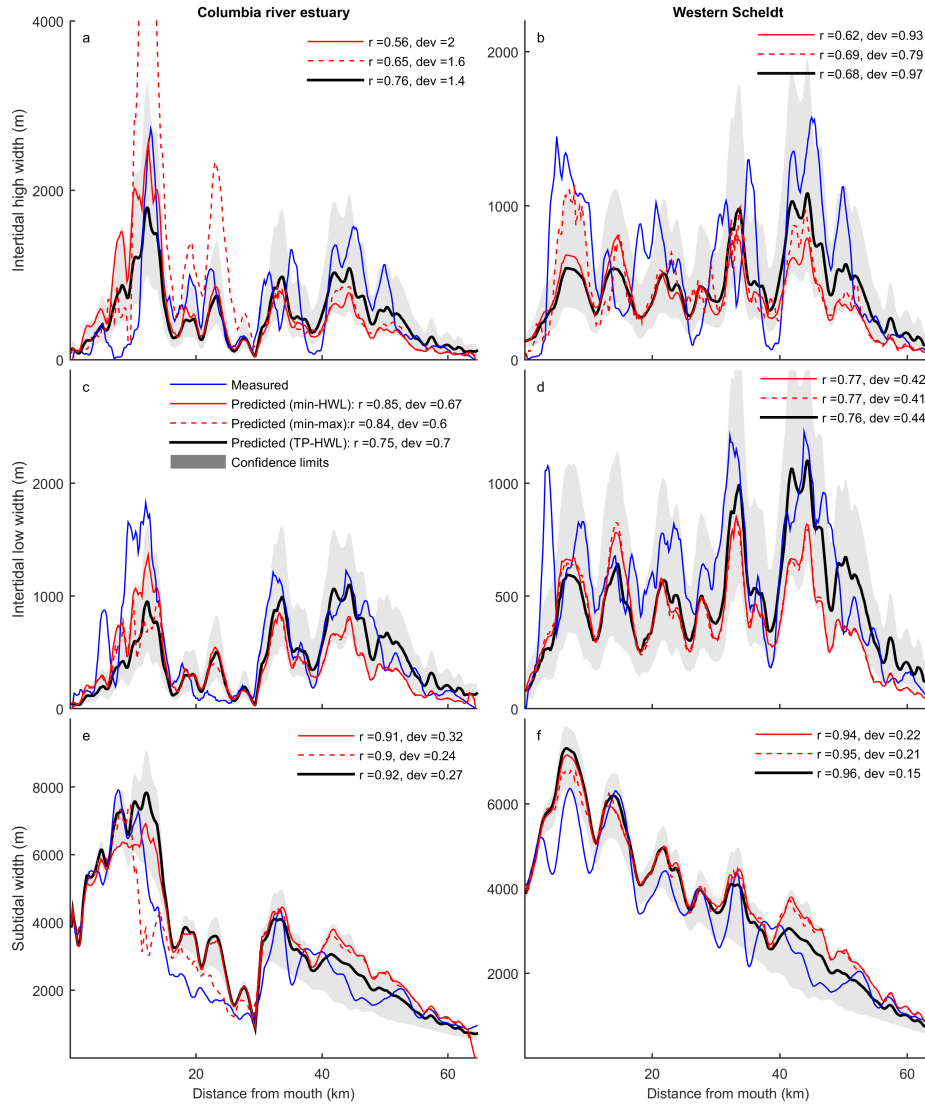

**Figure 10.** Comparison of measured and predicted values of intertidal high, intertidal low and subtidal width for the Columbia river estuary (a,c,e) and the Western Scheldt (b,d,f). Predicted nondimensional hypsometry was dimensionalised for each cross-section using three methods (explained in methods) and uncertainty margins are given for one of the predictions (solid black line). In the legend,  $r$  indicates the Pearson product-moment correlation coefficient and  $dev$  the average factor of deviation between the predicted (TP-HWL) and measured lines.

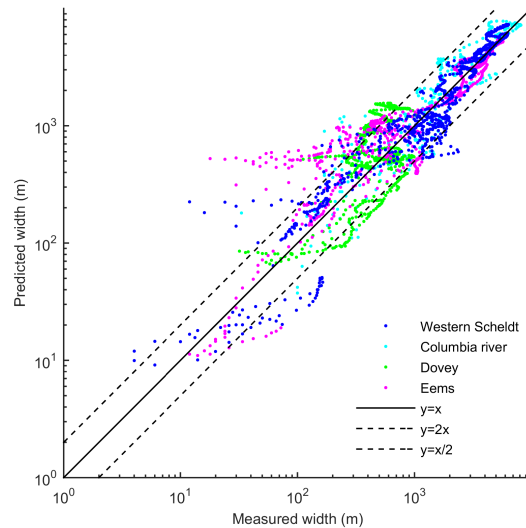

**Figure 11.** Comparison of measured and predicted width of intertidal and subtidal width. The (solid) line of equality indicates a perfect fit and dashed lines indicate a deviation of a factor 2. Percentage of measurements within these margins are indicated in Table 2.

These estuaries typically have a linear bed profile varying from an along-channel constant depth to strongly linear sloping (e.g. the Mersey in UK). In the latter case, the elevation at which subtidal and intertidal area occur varies significantly along-channel (Blott et al., 2006). Additionally, friction and convergence may cause the tidal range to either dampen or amplify causing variation in tidal elevation, subtidal area and tidal prism (Savenije, 2006). Consequently, the along-channel cross-section hypsometry should be assumed to be relative to an along-channel varying high water level or mean sea level rather than an along-channel fixed vertical datum. Interpreting these along channel variations remains an open question because of the reasons outlined above. Nevertheless, if desired, along-channel varying hypsometry predictions can be converted in one single summarising curve (Fig. 12), which shows that also the basin hypsometry can be predicted when limited data is available.

Our results show that hypsometry is not only a tool to predict morphology when limited data is available, but that hypsometry can also be used to reduce a large dataset of bathymetry and to study evolution of bathymetry over time. In the case of Strahler (1952), hypsometry fits result in along-channel profiles of  $z$ - and  $r$ -values, but in practice any function or shape could be fitted. For example, the locations along the Western Scheldt where major dredging and dumping took place showed weaker correlation with the original Strahler (1952) shape (Fig. 13). In these cases, fits with higher quality (lower RMSE) were obtained when we used the inverted hypsometric function (Eq. 4) (Fig. 13b,e). So in practice, one could fit a range of different hypsometry shapes and subsequently find out which of these shapes fit best on the used dataset. It can indicate that certain parts along the estuary require a separate hypsometric description. The fitting parameters are a method to describe the along-channel variation (Fig. 13b,d). Hypsometry can be fitted to compare data from nature, physical experiments and numerical modelling and subsequently study for example the effect of vegetation, cohesive mud and the influence of management on these systems.

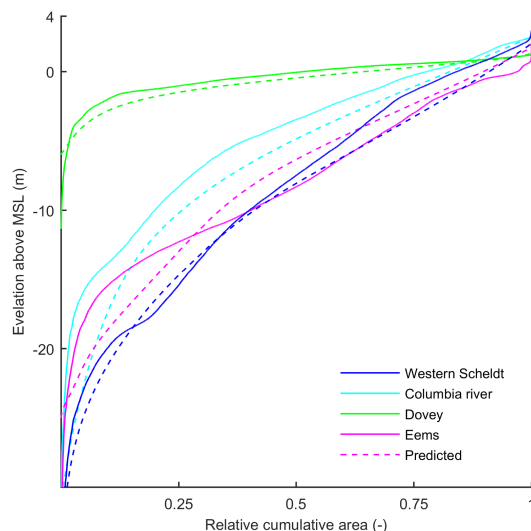

**Figure 12.** Hypsometry as summarised in a single curve for the entire estuaries. Solid lines are measured from bathymetry, dashed lines based on the predictions.

#### 4.1 Implications for management of estuaries

In many estuaries from around the world subtidal channels are used as shipping fairways, while the intertidal bars (or shoals) form valuable ecological habitat (e.g. Bouma et al., 2005). For example in the Western Scheldt, the shipping fairway is now maintained at a depth of 14.5m below Lowest Astronomical Tide (de Vriend et al., 2011; Depreiter et al., 2012). With empirical  
 5 hypsometry predictions we can estimate the width below a certain depth required for shipping, which gives estimates of what volume to dredge and at what locations along the estuary, which is relevant for construction of future shipping fairways in estuaries for which we may have limited data.

In contrast, low-dynamic intertidal areas are valuable ecological habitat, for example for the Western Scheldt there is an obligation to maintain a certain amount of intertidal area (Depreiter et al., 2012). Previously, Townend (2008) showed that  
 10 basin hypsometry can be a tool to design breaches in managed re-alignment sites and can provide an indication of habitat composition. Hypsometry analysis per cross-section shows that estuary outline translates into intertidal area, which implies that locations where the estuary is relatively wide have a relatively wide intertidal area. The ecological value is determined by the area of low-dynamical undep water and intertidal areas (for settling and feeding) (Depreiter et al., 2012). This means that the edges should neither become steeper nor higher (leading to permanent dry-fall) or deeper. Hypsometry fits (in case of  
 15 available data) or predictions (in case of limited data) can indicate which locations along the estuary have a risk to transform away from low-dynamic area or have the potential to become low-dynamic area by suppletion of dredged sediment.

The occurrence of vegetation species depend on bed elevation, salinity, maximum flow velocity and sediment type (de Jong, 1999; Gurnell et al., 2012). Even though predicted hypsometry only gives bed elevations, a comparison of the height interval

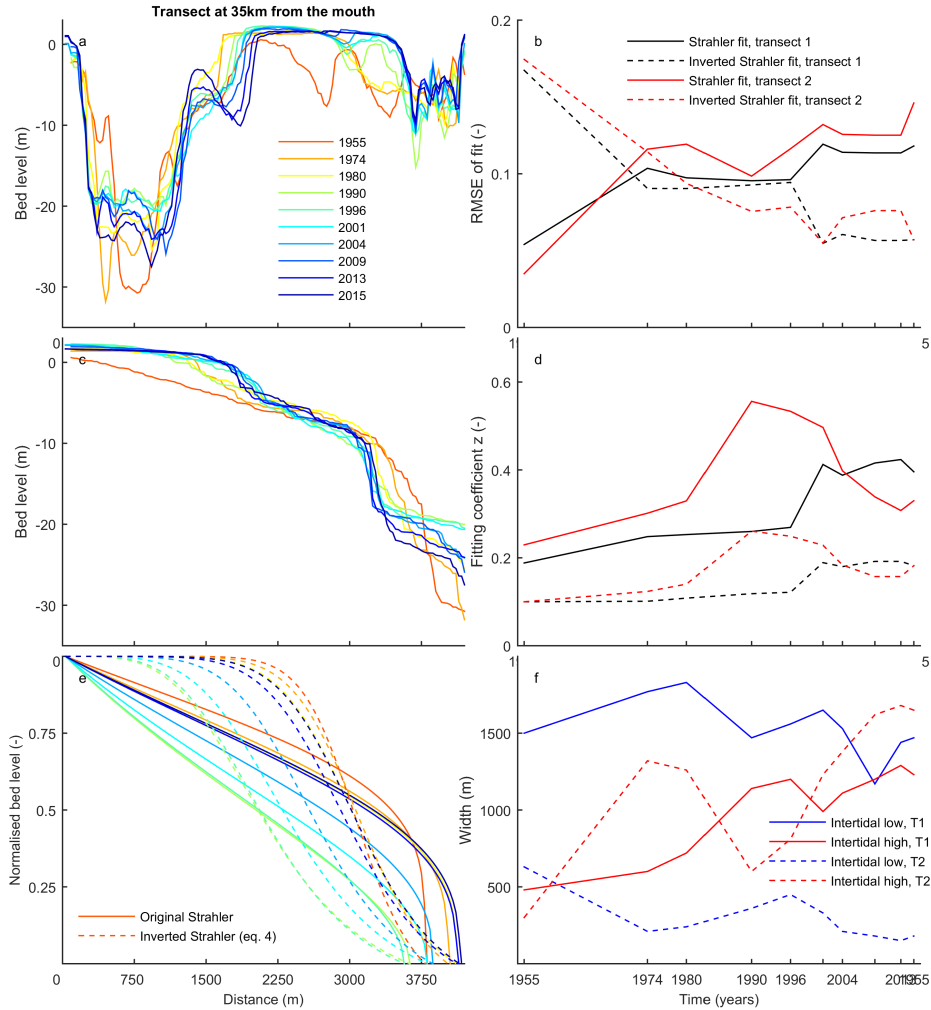

**Figure 13.** (a) Evolution of cross-section in the Western Scheldt where significantly has been dredged and dumped (The *Drempel van Hansweert*), (c) Measured hypsometric profiles of the same time steps. (e) Best fit hypsometries using original Strahler equation [solid] and inverted Strahler function (Eq. 4) [dashed], (b) Quality of the two types of fits shows that the shape of the best fitting hypsometric curve changes from convex to the inverted equation in the 1970s-1980s. (d) Fitting coefficients for  $z$  increase over time for both hypsometry types and both transects. (f) Intertidal high area increased over this period while intertidal low area remained constant [Transect 1] or decreased [Transect 2].

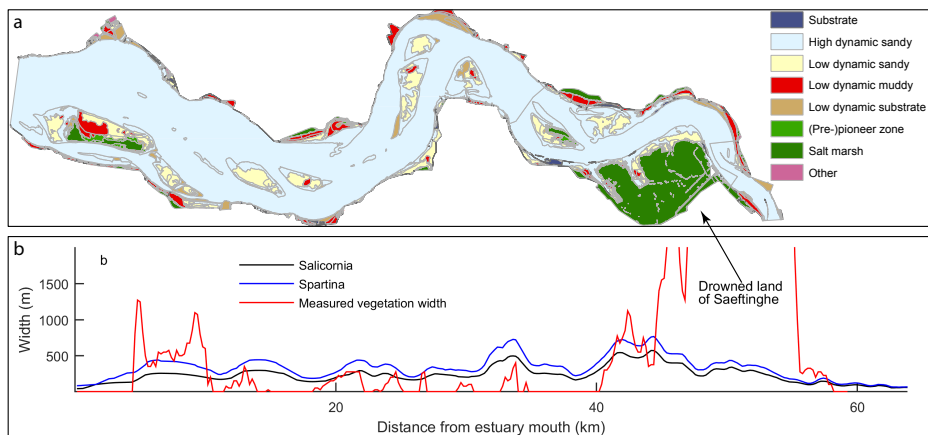

**Figure 14.** (a) Ecotope map of the Western Scheldt (2012), obtained from Rijkswaterstaat. (b) Prediction of the width in which *Salicornia* (black) and *Spartina* (blue) can occur when assuming that *Spartina* occurs between MSL and 1.5 m above and *Salicornia* occurs between 1.0 and 2.5m, while ignoring velocity, salinity and sediment type constraints. Red line indicates measured width of vegetation based on ecotope map. The Drowned land of Saeftinghe is excluded in the predictions, because the high water line was the boundary of the analysed bathymetry, while it is included in the measured data.

in which *Salicornia* and *Spartina* can occur (Mckee and Patrick, 1988; Davy et al., 2001; van Braeckel et al., 2008), showed similar trends and the same order of magnitude as the measured vegetation from ecotope maps of the Western Scheldt in 2012 (Fig. 14). Some underpredictions arise in parts along the estuary where bed elevations above the high water level occur, such as at the Drowned land of Saeftinghe. However, in general the vegetation width is overpredicted because (1) hypsometry is stretched between the high water line and channel depth and (2) other constraining biotic and abiotic factors were excluded.

## 5 Conclusions

We studied the relation between along-channel planform geometry of sandy estuaries and their hypsometry, which characterises the distribution of along-channel and cross-channel bed-levels. The vertical dimensions were found to relate to the horizontal dimensions. In other words, the degree to which the estuary width deviates from an ideal converging estuary shape reflects in the occurring hypsometry. At locations where the width is much larger than ideal, convex hypsometric shapes are observed, contrary to the locations where the estuary width is close to ideal, where concave hypsometric shapes are observed. In between these extreme end members, a gradual transition with quasi-periodic variation was observed. This implies that it is possible to predict the along-channel varying hypsometry of estuaries, which is relevant for estuaries for which limited data is available. To obtain broad brush estimates of the occurring bed levels, only the estuary outline and a typical tidal amplitude are required.

The predictions can be used to study the presence and evolution of intertidal area, which forms valuable ecological habitat, and to get estimates of typical volumes that might need to be dredged when constructing shipping fairways.

*Data availability.* Bathymetry was obtained from Rijkswaterstaat for the Western Scheldt and Eems estuary, from Natural Resources Wales via Dr. Emmer Litt for the Dovey and from Lower Columbia Estuary Partnership for the Columbia River estuary.

*Author contributions.* The authors contributed in the following proportions to conception and design, data collection and processing, analysis and conclusions, and manuscript preparation: JRFWL(60,55,75,70%), SS(15,40,15,15%), MGK(25,5,10,15%).

5 *Competing interests.* The authors declare that they have no conflict of interest.

*Acknowledgements.* This research was supported by Future Deltas, Utrecht University (grant to JRFWL) and by the Dutch Technology Foundation TTW (grant Vici 016.140.316/13710 to MGK), which is part of the Netherlands Organisation for Scientific Research (NWO), and is partly funded by the Ministry of Economic Affairs. This work is part of the PhD research of JRFWL. We acknowledge a data processing contribution by Andy Bruijns as part of his MSc guided research. ~~Reviewers will be acknowledged~~ Reviews by Ian Townend and

10 one anonymous reviewers helped to improve the manuscript.

## References

- Blott, S. J., Pye, K., van der Wal, D., and Neal, A.: Long-term morphological change and its causes in the Mersey Estuary, NW England, *Geomorphology*, 81, 185–206, 2006.
- Bolle, A., Wang, Z. B., Amos, C., and de Ronde, J.: The influence of changes in tidal asymmetry on residual sediment transport in the Western Scheldt, *Continental Shelf Research*, 30, 871–882, 2010.
- Boon, J. D.: Tidal discharge asymmetry in a salt marsh drainage system, *Limnology and Oceanography*, 20, 71–80, 1975.
- Boon, J. D. and Byrne, R. J.: On basin hypsometry and the morphodynamic response of coastal inlet systems, *Marine Geology*, 40, 27–48, 1981.
- Bouma, H., de Jong, D., Twisk, F., and Wolfstein, K.: A Dutch Ecotope system for coastal waters (ZES. 1), To map the potential occurrence of ecological communities in Dutch coastal and transitional waters, Tech. rep., Rijkswaterstaat, Report RIKZ/2005.024, 2005.
- Braat, L., van Kessel, T., Leuven, J. R. F. W., and Kleinhans, M. G.: Effects of mud supply on large-scale estuary morphology and development over centuries to millennia, *Earth Surface Dynamics*, 5, 617–652, <https://doi.org/10.5194/esurf-2017-14>, 2017.
- Dam, G., van der Wegen, M., Roelvink, D., Labeur, R., and Blik, B.: Simulation of long-term morphodynamics of the Western Scheldt, in: 36st IAHR congress, The Hague, Netherlands, 2015.
- Davies, G. and Woodroffe, C. D.: Tidal estuary width convergence: Theory and form in North Australian estuaries, *Earth Surface Processes and Landforms*, 35, 737–749, 2010.
- Davy, A. J., Bishop, G. F., and Costa, C. S. B.: *Salicornia L.* (*Salicornia pusilla J. woods*, *S. ramosissima J. woods*, *S. europaea L.*, *S. obscura PW ball & tutin*, *S. nitens PW ball & tutin*, *S. fragilis PW ball & tutin* and *S. dolichostachya moss*), *Journal of Ecology*, 89, 681–707, 2001.
- de Haas, T., Pierik, H., van der Spek, A., Cohen, K., van Maanen, B., and Kleinhans, M.: Holocene evolution of tidal systems in The Netherlands: Effects of rivers, coastal boundary conditions, eco-engineering species, inherited relief and human interference, *Earth-Science Reviews*, 177, 139 – 163, <https://doi.org/https://doi.org/10.1016/j.earscirev.2017.10.006>, 2017.
- de Jong, D.: Ecotopes in the Dutch marine tidal waters: a proposal for a classification of ecotopes and a method to map them, Tech. rep., Rijkswaterstaat, Report RIKZ/99.017, 1999.
- de Vet, P., van Prooijen, B., and Wang, Z.: The differences in morphological development between the intertidal flats of the Eastern and Western Scheldt, *Geomorphology*, 281, 31–42, 2017.
- de Vriend, H. J., Wang, Z. B., Ysebaert, T., Herman, P. M., and Ding, P.: Eco-morphological problems in the Yangtze Estuary and the Western Scheldt, *Wetlands*, 31, 1033–1042, 2011.
- Depreiter, D., Sas, M., Beirinckx, K., and Liek, G.-J.: Flexible Disposal Strategy: monitoring as a key to understanding and steering environmental responses to dredging and disposal in the Scheldt Estuary, Tech. rep., International Marine & Dredging Consultants, 2012.
- Dieckmann, R., Osterthun, M., and Partenscky, H.-W.: Influence of water-level elevation and tidal range on the sedimentation in a German tidal flat area, *Progress in Oceanography*, 18, 151–166, 1987.
- Dronkers, J.: Convergence of estuarine channels, *Continental Shelf Research*, 144, 120–133, 2017.
- Eysink, W.: Morphologic response of tidal basins to changes, *Coastal Engineering Proceedings*, 1, 1948–1961, 1990.
- Friedrichs, C. T.: Stability shear stress and equilibrium cross-sectional geometry of sheltered tidal channels, *Journal of Coastal Research*, 11, 1062–1074, 1995.
- Friedrichs, C. T.: Barotropic tides in channelized estuaries, *Contemporary Issues in Estuarine Physics*, pp. 27–61, 2010.



- Friedrichs, C. T. and Aubrey, D. G.: Non-linear tidal distortion in shallow well-mixed estuaries: a synthesis, *Estuarine, Coastal and Shelf Science*, 27, 521–545, 1988.
- Gardiner, S., Nicholls, R., and Tanton, T.: Management Implications of Flood/Ebb tidal dominance: its influence on saltmarsh and intertidal habitat stability in Poole Harbour, in: *Littoral 2010—Adapting to Global Change at the Coast: Leadership, Innovation, and Investment*, p. 06004, EDP Sciences, 2011.
- 5 Gisen, J. I. A. and Savenije, H. H.: Estimating bankfull discharge and depth in ungauged estuaries, *Water Resources Research*, 51, 2298–2316, 2015.
- Gurnell, A. M., Bertoldi, W., and Corenblit, D.: Changing river channels: The roles of hydrological processes, plants and pioneer fluvial landforms in humid temperate, mixed load, gravel bed rivers, *Earth-Science Reviews*, 111, 129–141, 2012.
- 10 Hey, R. D. and Thorne, C. R.: Stable channels with mobile gravel beds, *Journal of Hydraulic Engineering*, 112, 671–689, 1986.
- Hu, Z., Belzen, J., Wal, D., Balke, T., Wang, Z. B., Stive, M., and Bouma, T. J.: Windows of opportunity for salt marsh vegetation establishment on bare tidal flats: The importance of temporal and spatial variability in hydrodynamic forcing, *Journal of Geophysical Research: Biogeosciences*, 120, 1450–1469, 2015.
- Jeuken, M. and Wang, Z.: Impact of dredging and dumping on the stability of ebb–flood channel systems, *Coastal Engineering*, 57, 553–566, 15 2010.
- Kirby, R.: Practical implications of tidal flat shape, *Continental Shelf Research*, 20, 1061–1077, 2000.
- Kleinhans, M. G. and van den Berg, J. H.: River channel and bar patterns explained and predicted by an empirical and a physics-based method, *Earth Surface Processes and Landforms*, 36, 721–738, <https://doi.org/10.1002/esp.2090>, 2011.
- Kleinhans, M. G., Leuven, J. R. F. W., and Braat, L.: Alternative equilibrium of estuaries with varying width and dynamic tidal sand bars, 20 *Nature Geoscience*, (submitted), 2018.
- Langbein, W.: The hydraulic geometry of a shallow estuary, *Hydrological Sciences Journal*, 8, 84–94, 1963.
- Lanzoni, S. and D’Alpaos, A.: On funneling of tidal channels, *Journal of Geophysical Research: Earth Surface*, 120, 433–452, 2015.
- Leopold, L. B. and Maddock Jr, T.: *The Hydraulic Geometry of Stream Channels and Some Physiographic Implications*, Tech. rep., U.S. Geological Survey, Professional Paper 252, 1953.
- 25 Lesourd, S., Lesueur, P., Brun-Cottan, J.-C., Auffret, J.-P., Poupinet, N., and Laignel, B.: Morphosedimentary evolution of the macrotidal Seine estuary subjected to human impact, *Estuaries and Coasts*, 24, 940–949, 2001.
- Leuven, J. R. F. W., Kleinhans, M. G., Weisscher, S. A. H., and van der Veet, M.: Tidal sand bar dimensions and shapes in estuaries, *Earth-science reviews*, 161, 204–233, <https://doi.org/10.1016/j.earscirev.2016.08.004>, 2016.
- Leuven, J. R. F. W., Haas, T., Braat, L., and Kleinhans, M. G.: Topographic forcing of tidal sand bar patterns for irregular estuary planforms, 30 *Earth Surface Processes and Landforms*, 43, 172–186, 2017.
- Leuven, J. R. F. W., Braat, L., van Dijk, W. M., de Haas, T., and Kleinhans, M. G.: Growing forced bars determine non-ideal estuary planform, *Journal of Geophysical Research: Earth Surface*, (in prep), 2018.
- Mckee, K. L. and Patrick, W.: The relationship of smooth cordgrass (*Spartina alterniflora*) to tidal datums: a review, *Estuaries*, 11, 143–151, 1988.
- 35 Moore, R. D., Wolf, J., Souza, A. J., and Flint, S. S.: Morphological evolution of the Dee Estuary, Eastern Irish Sea, UK: a tidal asymmetry approach, *Geomorphology*, 103, 588–596, 2009.
- O’Brien, M. P.: Equilibrium flow areas of inlets on sandy coasts, in: *Journal of the waterways and harbors division, Proceedings of the American Society of Civil Engineers*, pp. 43–52, ASCE, 1969.

- O'Connor, B.: Short and long term changes in estuary capacity, *Journal of the Geological Society*, 144, 187–195, 1987.
- Pillsbury, G.: *Tidal Hydraulics*. Revised Edition, Corps of Engineers, US Army, May, 1956.
- Plancke, Y. and Vos, G. R.: Sediment transport in the Schelde-estuary: a comparison between measurements, transport formula and numerical models, in: *Proceedings of the 4th IAHR Europe Congress, Liege, Belgium, 27-29 July 2016: Sustainable Hydraulics in the Era of Global Change*, pp. 498–503, 2016.
- 5 Savenije, H. H.: *Salinity and tides in alluvial estuaries*, Elsevier, 2006.
- Savenije, H. H.: Prediction in ungauged estuaries: An integrated theory, *Water Resources Research*, 51, 2464–2476, 2015.
- Schramkowski, G., Schuttelaars, H., and De Swart, H.: The effect of geometry and bottom friction on local bed forms in a tidal embayment, *Continental Shelf Research*, 22, 1821–1833, 2002.
- 10 Seminara, G. and Tubino, M.: Sand bars in tidal channels. Part 1. Free bars, *Journal of Fluid Mechanics*, 440, 49–74, 2001.
- Strahler, A. N.: Hypsometric (area-altitude) analysis of erosional topography, *Geological Society of America Bulletin*, 63, 1117–1142, 1952.
- Swinkels, C. M., Jeuken, C. M., Wang, Z. B., and Nicholls, R. J.: Presence of connecting channels in the Western Scheldt Estuary, *Journal of Coastal Research*, pp. 627–640, 2009.
- Toffolon, M. and Crosato, A.: Developing macroscale indicators for estuarine morphology: The case of the Scheldt Estuary, *Journal of Coastal Research*, 23, 195–212, 2007.
- 15 Toffolon, M. and Lanzoni, S.: Morphological equilibrium of short channels dissecting the tidal flats of coastal lagoons, *Journal of Geophysical Research: Earth Surface*, 115, 2010.
- Townend, I.: An exploration of equilibrium in Venice Lagoon using an idealised form model, *Continental Shelf Research*, 30, 984–999, 2010.
- Townend, I.: The estimation of estuary dimensions using a simplified form model and the exogenous controls, *Earth Surface Processes and Landforms*, 37, 1573–1583, 2012.
- 20 Townend, I. H.: Hypsometry of estuaries, creeks and breached sea wall sites, *Proceedings of the Institution of Civil Engineers-Maritime Engineering*, 161, 23–32, 2008.
- van Braeckel, A., Vandevoorde, B., and van den Bergh, E.: *Schorecotopen van de Schelde. Aanzet tot de ontwikkeling van één schorecotopenstelsel voor Vlaanderen en Nederland*, Instituut voor Natuur-en Bosonderzoek, 2008.
- 25 van de Lageweg, W. I., Dijk, W. M., Box, D., and Kleinhans, M. G.: Archimetrics: a quantitative tool to predict three-dimensional meander belt sandbody heterogeneity, *The Depositional Record*, 2, 22–46, 2016.
- van der Wegen, M. and Roelvink, J.: Long-term morphodynamic evolution of a tidal embayment using a two-dimensional, process-based model, *Journal of Geophysical Research: Oceans*, 113, 2008.
- van der Wegen, M. and Roelvink, J.: Reproduction of estuarine bathymetry by means of a process-based model: Western Scheldt case study, the Netherlands, *Geomorphology*, 179, 152–167, 2012.
- 30 van Maren, D., Van Kessel, T., Cronin, K., and Sittoni, L.: The impact of channel deepening and dredging on estuarine sediment concentration, *Continental Shelf Research*, 95, 1–14, 2015.
- Wang, Z. and Winterwerp, J.: Impact of dredging and dumping on the stability of ebb-flood channel systems, in: *Proceedings of the 2nd IAHR symposium on River, Coastal and Estuarine Morphodynamics*, pp. 515–524, 2001.
- 35 Wang, Z., Jeuken, M., Gerritsen, H., De Vriend, H., and Kornman, B.: Morphology and asymmetry of the vertical tide in the Westerschelde estuary, *Continental Shelf Research*, 22, 2599–2609, 2002.
- Wang, Z., Van Maren, D., Ding, P., Yang, S., Van Prooijen, B., De Vet, P., Winterwerp, J., De Vriend, H., Stive, M., and He, Q.: Human impacts on morphodynamic thresholds in estuarine systems, *Continental Shelf Research*, 111, 174–183, 2015.

Wolanski, E. and Elliott, M.: Estuarine ecohydrology: an introduction, Elsevier, 2015.
